# Supplementary material for: Mechanistic insights into the protective roles of polyphosphate against amyloid cytotoxicity
Source: Life Sci Alliance. 2019 Sep 18;2(5):e201900486. doi: 10.26508/lsa.201900486 (PMC6751573; doi:10.26508/lsa.201900486)
Supplement: Supplementary file 2 [file LSA-2019-00486_SdataF2.xlsx]

## Sheet: 2A Fluorescence polarization
Time [min]	monomers	Fibers
0.1016	0.108025	0.119408
0.2	0.107238	0.11434
0.2985	0.111777	0.089365
0.3969	0.100628	0.101636
0.4957	0.131023	0.10964
0.594	0.134879	0.126536
0.6925	0.116039	0.098645
0.7909	0.128968	0.101021
0.8895	0.088345	0.121086
0.9879	0.100984	0.134786
1.0863	0.083337	0.133324
1.1847	0.117142	0.108918
1.2832	0.10394	0.108867
1.3815	0.112097	0.107271
1.48	0.103474	0.111853
1.5784	0.123451	0.112022
1.6769	0.0887	0.103571
1.7754	0.126861	0.130543
1.8738	0.12968	0.142324
1.9724	0.111173	0.098072
2.0707	0.139139	0.1292
2.169	0.12283	0.175906
2.2675	0.123596	0.224102
2.3659	0.115171	0.21301
2.4644	0.114059	0.207327
2.5629	0.091234	0.211239
2.6612	0.104874	0.202599
2.7597	0.087726	0.187532
2.8582	0.116936	0.193737
2.9565	0.110539	0.229904
3.055	0.126816	0.212218
3.1534	0.077588	0.184843
3.2519	0.12014	0.194979
3.3504	0.091825	0.199364
3.4487	0.119334	0.211348
3.5472	0.090764	0.210404
3.6456	0.09143	0.206626
3.743	0.109111	0.203619
3.8414	0.104485	0.209108
3.9399	0.12939	0.264333
4.0383	0.155884	0.190566
4.1368	0.126941	0.214707
4.2352	0.110375	0.212638
4.3337	0.119545	0.228408
4.432	0.119571	0.185703
4.5305	0.102887	0.190445
4.6289	0.108186	0.230463
4.7284	0.138254	0.216628
4.8269	0.103953	0.19872
4.9253	0.09455	0.213191
5.0229	0.11903	0.216906
5.12	0.111944	0.191612
5.2185	0.120065	0.211778
5.317	0.113939	0.174175
5.4154	0.111286	0.24561
5.5139	0.128616	0.194264
5.6117	0.111066	0.258351
5.7104	0.132922	0.218176
5.8094	0.110562	0.211133
5.9089	0.099409	0.224547
6.0057	0.1034	0.17451
6.1039	0.119813	0.201098
6.2027	0.103186	0.218631
6.301	0.136122	0.237576
6.3987	0.110671	0.199147
6.4974	0.124773	0.190449
6.5977	0.126566	0.215289
6.6964	0.121423	0.212932
6.795	0.097513	0.164783

## Sheet: 2B quant EM
asyn -/- PP	asyn -/+	asyn +/- PP
149.409	110.5	93.4432
150.28	103.894	106.263
157.392	145.272	120.074
234.885	96.3958	80.1744
194.078	78.4749	92.1614
131.113	79.2042	104.179
135.405	144.843	90.4774
123.908	100.213	96.3582
158.057	108.347	82.8706
193.848	89.6929	94.3427
174.351	113.601	96.6433
114.158	55.9196	120.074
151.796	112.688	106.263
150.28	88.6077	93.4432
116.692	36.781	105.346
156.053	74.5146	101.83
184.637	68.9564	97.8411
161.315	47.5305	91.6796
176.135	125.086	106.906
205.006	89.6243	106.263
211.433	97.4919	106.703
206.041	73.9024	91.9736
169.94	136.074	80.7225
186.703	180.356	99.2511
194.931	115.808	97.64
133.517	102.288	90.1724
207.61	110.765	98.3163
117.439	117.959	89.4542
169.956	85.5469	93.2664
169.032	94.9217	123.764
172.888	116.728	116.478
178.177	134.375	98.661
187.576	102.215
206.182	67.5155
159.869	84.285
165.677	117.134
119.013	101.3
159.732	96.8621
176.135
145.86
148.185

## Sheet: 2DX-ray diffraction
2theta, I/s	PPi(circular),	PPi(eq)	Ppi (Mer)	resolution(angstroms)			2theta, I/s	WT (circular)	WT (Eq)	WT (mer)	resolution(angstroms)
1.89008	0.193	0.432	0.012	34.169			0.77345	0.086	0.172	0.009	34.169
1.91154	0.194	0.43	0.012	33.786			0.79493	0.086	0.173	0.008	33.786
1.933	0.195	0.426	0.012	33.411			0.81641	0.088	0.174	0.008	33.411
1.95446	0.19	0.414	0.012	33.044			0.83789	0.088	0.175	0.009	33.044
1.97592	0.19	0.408	0.013	32.685			0.85937	0.088	0.173	0.01	32.685
1.99738	0.187	0.398	0.013	32.334			0.88085	0.089	0.173	0.009	32.334
2.01884	0.185	0.389	0.013	31.99			0.90233	0.09	0.17	0.01	31.99
2.0403	0.182	0.381	0.013	31.654			0.92381	0.091	0.171	0.01	31.654
2.06176	0.178	0.367	0.014	31.324			0.94529	0.091	0.171	0.01	31.324
2.08322	0.178	0.361	0.015	31.002			0.96677	0.091	0.168	0.01	31.002
2.10467	0.175	0.351	0.015	30.686			0.98825	0.092	0.17	0.01	30.686
2.12613	0.172	0.339	0.015	30.376			1.00973	0.09	0.163	0.01	30.376
2.14759	0.168	0.33	0.015	30.073			1.03121	0.093	0.166	0.011	30.073
2.16904	0.167	0.32	0.016	29.775			1.05269	0.093	0.164	0.011	29.775
2.1905	0.165	0.315	0.016	29.484			1.07417	0.093	0.163	0.012	29.484
2.21195	0.162	0.305	0.015	29.198			1.09565	0.093	0.162	0.011	29.198
2.2334	0.16	0.298	0.016	28.917			1.11713	0.093	0.16	0.011	28.917
2.25486	0.157	0.29	0.017	28.642			1.1386	0.093	0.159	0.012	28.642
2.27631	0.155	0.283	0.018	28.372			1.16008	0.092	0.157	0.011	28.372
2.29776	0.153	0.276	0.017	28.107			1.18156	0.094	0.156	0.013	28.107
2.31921	0.152	0.275	0.017	27.847			1.20303	0.093	0.156	0.013	27.847
2.34066	0.148	0.263	0.017	27.592			1.22451	0.093	0.155	0.012	27.592
2.36211	0.147	0.262	0.017	27.342			1.24599	0.093	0.153	0.012	27.342
2.38356	0.144	0.252	0.018	27.096			1.26746	0.094	0.155	0.012	27.096
2.40501	0.143	0.248	0.018	26.854			1.28894	0.094	0.154	0.013	26.854
2.42646	0.141	0.244	0.018	26.617			1.31041	0.094	0.154	0.013	26.617
2.4479	0.138	0.235	0.019	26.384			1.33189	0.096	0.155	0.014	26.384
2.46935	0.138	0.235	0.019	26.155			1.35336	0.094	0.15	0.014	26.155
2.4908	0.137	0.23	0.018	25.929			1.37483	0.095	0.153	0.014	25.929
2.51224	0.136	0.226	0.019	25.708			1.39631	0.095	0.151	0.014	25.708
2.53369	0.134	0.222	0.02	25.491			1.41778	0.095	0.15	0.014	25.491
2.55513	0.132	0.218	0.02	25.277			1.43925	0.096	0.15	0.014	25.277
2.57657	0.132	0.218	0.019	25.066			1.46073	0.098	0.151	0.015	25.066
2.59801	0.131	0.211	0.02	24.859			1.4822	0.097	0.151	0.014	24.859
2.61946	0.129	0.208	0.02	24.656			1.50367	0.097	0.151	0.014	24.656
2.6409	0.13	0.208	0.021	24.456			1.52514	0.097	0.15	0.015	24.456
2.66234	0.129	0.207	0.02	24.259			1.54661	0.099	0.154	0.014	24.259
2.68377	0.127	0.203	0.02	24.065			1.56808	0.099	0.154	0.015	24.065
2.70521	0.127	0.201	0.021	23.875			1.58955	0.099	0.152	0.015	23.875
2.72665	0.127	0.199	0.021	23.687			1.61102	0.099	0.152	0.015	23.687
2.74809	0.127	0.198	0.021	23.502			1.63249	0.101	0.152	0.016	23.502
2.76952	0.127	0.199	0.021	23.32			1.65396	0.102	0.154	0.016	23.32
2.79096	0.126	0.195	0.022	23.141			1.67542	0.102	0.151	0.016	23.141
2.81239	0.124	0.188	0.022	22.965			1.69689	0.104	0.158	0.016	22.965
2.83383	0.124	0.188	0.023	22.791			1.71836	0.103	0.155	0.016	22.791
2.85526	0.125	0.19	0.023	22.62			1.73982	0.104	0.155	0.018	22.62
2.87669	0.125	0.19	0.024	22.452			1.76129	0.104	0.155	0.018	22.452
2.89812	0.124	0.188	0.024	22.286			1.78276	0.104	0.154	0.018	22.286
2.91956	0.124	0.186	0.025	22.122			1.80422	0.106	0.156	0.018	22.122
2.94098	0.124	0.186	0.026	21.961			1.82568	0.106	0.157	0.019	21.961
2.96241	0.124	0.185	0.025	21.802			1.84715	0.106	0.156	0.02	21.802
2.98384	0.124	0.183	0.027	21.646			1.86861	0.107	0.158	0.02	21.646
3.00527	0.124	0.183	0.028	21.491			1.89008	0.108	0.157	0.021	21.491
3.0267	0.124	0.183	0.029	21.339			1.91154	0.108	0.157	0.022	21.339
3.04812	0.125	0.181	0.03	21.189			1.933	0.108	0.156	0.022	21.189
3.06955	0.126	0.183	0.031	21.041			1.95446	0.108	0.157	0.023	21.041
3.09097	0.125	0.18	0.033	20.896			1.97592	0.109	0.157	0.025	20.896
3.11239	0.125	0.182	0.035	20.752			1.99738	0.109	0.156	0.026	20.752
3.13382	0.125	0.179	0.035	20.61			2.01884	0.109	0.156	0.027	20.61
3.15524	0.126	0.181	0.037	20.47			2.0403	0.11	0.157	0.028	20.47
3.17666	0.127	0.181	0.038	20.332			2.06176	0.112	0.158	0.03	20.332
3.19808	0.126	0.18	0.04	20.196			2.08322	0.11	0.155	0.03	20.196
3.21949	0.126	0.181	0.041	20.062			2.10467	0.11	0.154	0.032	20.062
3.24091	0.129	0.182	0.044	19.929			2.12613	0.111	0.157	0.034	19.929
3.26233	0.127	0.179	0.045	19.798			2.14759	0.11	0.154	0.035	19.798
3.28375	0.128	0.18	0.046	19.669			2.16904	0.112	0.155	0.037	19.669
3.30516	0.128	0.179	0.047	19.542			2.1905	0.112	0.155	0.037	19.542
3.32657	0.129	0.179	0.05	19.416			2.21195	0.112	0.156	0.039	19.416
3.34799	0.129	0.178	0.052	19.292			2.2334	0.113	0.154	0.041	19.292
3.3694	0.129	0.178	0.054	19.169			2.25486	0.113	0.153	0.043	19.169
3.39081	0.13	0.18	0.055	19.048			2.27631	0.113	0.154	0.044	19.048
3.41222	0.13	0.178	0.058	18.929			2.29776	0.114	0.154	0.047	18.929
3.43363	0.132	0.178	0.06	18.811			2.31921	0.114	0.153	0.049	18.811
3.45504	0.133	0.18	0.064	18.694			2.34066	0.114	0.152	0.05	18.694
3.47645	0.133	0.18	0.064	18.579			2.36211	0.116	0.152	0.054	18.579
3.49785	0.133	0.178	0.067	18.466			2.38356	0.116	0.154	0.055	18.466
3.51926	0.133	0.178	0.067	18.353			2.40501	0.117	0.154	0.056	18.353
3.54066	0.134	0.179	0.071	18.242			2.42646	0.118	0.157	0.058	18.242
3.56207	0.134	0.181	0.07	18.133			2.4479	0.118	0.154	0.06	18.133
3.58347	0.134	0.179	0.072	18.025			2.46935	0.118	0.153	0.06	18.025
3.60487	0.134	0.176	0.074	17.918			2.4908	0.119	0.154	0.064	17.918
3.62627	0.135	0.178	0.073	17.812			2.51224	0.118	0.153	0.064	17.812
3.64767	0.136	0.18	0.075	17.707			2.53369	0.121	0.156	0.066	17.707
3.66907	0.136	0.179	0.077	17.604			2.55513	0.122	0.156	0.067	17.604
3.69047	0.135	0.176	0.076	17.502			2.57657	0.122	0.158	0.067	17.502
3.71186	0.135	0.178	0.076	17.401			2.59801	0.122	0.156	0.066	17.401
3.73326	0.135	0.176	0.077	17.302			2.61946	0.123	0.157	0.07	17.302
3.75465	0.135	0.178	0.076	17.203			2.6409	0.123	0.159	0.069	17.203
3.77605	0.135	0.179	0.076	17.106			2.66234	0.123	0.157	0.069	17.106
3.79744	0.134	0.177	0.076	17.009			2.68377	0.125	0.159	0.072	17.009
3.81883	0.135	0.177	0.078	16.914			2.70521	0.125	0.161	0.071	16.914
3.84022	0.135	0.177	0.078	16.82			2.72665	0.126	0.161	0.073	16.82
3.86161	0.135	0.177	0.078	16.727			2.74809	0.127	0.163	0.072	16.727
3.883	0.135	0.177	0.077	16.635			2.76952	0.127	0.161	0.073	16.635
3.90438	0.136	0.177	0.08	16.544			2.79096	0.128	0.163	0.074	16.544
3.92577	0.135	0.177	0.078	16.453			2.81239	0.128	0.165	0.074	16.453
3.94715	0.137	0.178	0.079	16.364			2.83383	0.13	0.166	0.075	16.364
3.96854	0.136	0.178	0.08	16.276			2.85526	0.131	0.167	0.077	16.276
3.98992	0.136	0.175	0.079	16.189			2.87669	0.13	0.167	0.075	16.189
4.0113	0.135	0.177	0.078	16.103			2.89812	0.131	0.167	0.077	16.103
4.03268	0.137	0.178	0.08	16.017			2.91956	0.133	0.169	0.078	16.017
4.05406	0.137	0.179	0.081	15.933			2.94098	0.133	0.17	0.077	15.933
4.07544	0.136	0.178	0.08	15.849			2.96241	0.132	0.169	0.079	15.849
4.09681	0.136	0.178	0.081	15.767			2.98384	0.133	0.17	0.08	15.767
4.11819	0.138	0.181	0.081	15.685			3.00527	0.133	0.169	0.079	15.685
4.13956	0.137	0.18	0.082	15.604			3.0267	0.133	0.17	0.079	15.604
4.16094	0.136	0.178	0.081	15.524			3.04812	0.134	0.169	0.08	15.524
4.18231	0.138	0.179	0.082	15.445			3.06955	0.133	0.17	0.079	15.445
4.20368	0.138	0.181	0.082	15.366			3.09097	0.135	0.173	0.08	15.366
4.22505	0.137	0.178	0.083	15.288			3.11239	0.133	0.17	0.081	15.288
4.24642	0.137	0.179	0.084	15.212			3.13382	0.134	0.171	0.08	15.212
4.26779	0.138	0.177	0.084	15.135			3.15524	0.135	0.171	0.082	15.135
4.28915	0.138	0.178	0.084	15.06			3.17666	0.136	0.172	0.082	15.06
4.31052	0.137	0.178	0.083	14.985			3.19808	0.135	0.171	0.081	14.985
4.33188	0.139	0.18	0.084	14.912			3.21949	0.136	0.172	0.081	14.912
4.35325	0.139	0.18	0.086	14.838			3.24091	0.136	0.173	0.082	14.838
4.37461	0.139	0.18	0.085	14.766			3.26233	0.134	0.17	0.082	14.766
4.39597	0.139	0.179	0.085	14.694			3.28375	0.135	0.171	0.082	14.694
4.41733	0.139	0.181	0.086	14.623			3.30516	0.135	0.17	0.083	14.623
4.43868	0.14	0.181	0.085	14.553			3.32657	0.136	0.174	0.084	14.553
4.46004	0.14	0.18	0.086	14.483			3.34799	0.136	0.172	0.084	14.483
4.4814	0.141	0.183	0.087	14.414			3.3694	0.135	0.172	0.084	14.414
4.50275	0.14	0.18	0.086	14.346			3.39081	0.136	0.172	0.084	14.346
4.5241	0.141	0.182	0.088	14.278			3.41222	0.136	0.174	0.083	14.278
4.54545	0.141	0.184	0.088	14.211			3.43363	0.136	0.173	0.084	14.211
4.5668	0.141	0.183	0.087	14.145			3.45504	0.136	0.174	0.084	14.145
4.58815	0.142	0.183	0.09	14.079			3.47645	0.136	0.173	0.085	14.079
4.6095	0.143	0.184	0.089	14.014			3.49785	0.137	0.174	0.085	14.014
4.63085	0.142	0.183	0.09	13.949			3.51926	0.137	0.174	0.086	13.949
4.65219	0.143	0.185	0.088	13.885			3.54066	0.138	0.173	0.086	13.885
4.67354	0.143	0.185	0.09	13.822			3.56207	0.137	0.173	0.086	13.822
4.69488	0.144	0.187	0.09	13.759			3.58347	0.138	0.174	0.089	13.759
4.71622	0.144	0.186	0.089	13.697			3.60487	0.138	0.173	0.088	13.697
4.73756	0.144	0.187	0.091	13.635			3.62627	0.137	0.172	0.088	13.635
4.7589	0.145	0.187	0.091	13.574			3.64767	0.137	0.172	0.088	13.574
4.78024	0.147	0.189	0.093	13.514			3.66907	0.138	0.174	0.089	13.514
4.80157	0.146	0.19	0.093	13.454			3.69047	0.138	0.172	0.09	13.454
4.82291	0.148	0.192	0.093	13.394			3.71186	0.139	0.174	0.09	13.394
4.84424	0.148	0.192	0.094	13.335			3.73326	0.139	0.174	0.09	13.335
4.86557	0.148	0.192	0.093	13.277			3.75465	0.139	0.174	0.09	13.277
4.8869	0.149	0.192	0.095	13.219			3.77605	0.139	0.173	0.09	13.219
4.90823	0.15	0.196	0.095	13.161			3.79744	0.139	0.173	0.091	13.161
4.92956	0.149	0.194	0.094	13.105			3.81883	0.139	0.174	0.091	13.105
4.95089	0.15	0.196	0.095	13.048			3.84022	0.14	0.174	0.092	13.048
4.97221	0.151	0.198	0.097	12.992			3.86161	0.141	0.176	0.092	12.992
4.99354	0.152	0.197	0.097	12.937			3.883	0.141	0.176	0.092	12.937
5.01486	0.152	0.196	0.098	12.882			3.90438	0.142	0.177	0.093	12.882
5.03618	0.153	0.2	0.097	12.827			3.92577	0.141	0.176	0.094	12.827
5.0575	0.154	0.2	0.099	12.773			3.94715	0.142	0.177	0.092	12.773
5.07882	0.154	0.201	0.099	12.72			3.96854	0.141	0.175	0.094	12.72
5.10013	0.156	0.204	0.098	12.667			3.98992	0.142	0.176	0.095	12.667
5.12145	0.155	0.202	0.099	12.614			4.0113	0.142	0.175	0.095	12.614
5.14277	0.156	0.204	0.1	12.562			4.03268	0.144	0.178	0.096	12.562
5.16408	0.156	0.204	0.1	12.51			4.05406	0.144	0.178	0.096	12.51
5.18539	0.157	0.204	0.101	12.458			4.07544	0.144	0.178	0.097	12.458
5.2067	0.159	0.207	0.103	12.407			4.09681	0.143	0.176	0.096	12.407
5.22801	0.158	0.207	0.102	12.357			4.11819	0.144	0.179	0.096	12.357
5.24931	0.159	0.207	0.102	12.307			4.13956	0.145	0.179	0.098	12.307
5.27062	0.159	0.209	0.103	12.257			4.16094	0.146	0.181	0.097	12.257
5.29192	0.16	0.21	0.103	12.208			4.18231	0.146	0.18	0.099	12.208
5.31322	0.163	0.214	0.104	12.159			4.20368	0.146	0.181	0.099	12.159
5.33453	0.162	0.213	0.104	12.11			4.22505	0.147	0.181	0.098	12.11
5.35582	0.162	0.213	0.102	12.062			4.24642	0.148	0.181	0.1	12.062
5.37712	0.162	0.212	0.104	12.015			4.26779	0.149	0.184	0.102	12.015
5.39842	0.162	0.212	0.105	11.967			4.28915	0.15	0.184	0.103	11.967
5.41971	0.162	0.212	0.105	11.92			4.31052	0.15	0.184	0.103	11.92
5.44101	0.163	0.213	0.106	11.874			4.33188	0.152	0.186	0.104	11.874
5.4623	0.164	0.216	0.105	11.827			4.35325	0.152	0.187	0.103	11.827
5.48359	0.164	0.216	0.106	11.781			4.37461	0.153	0.188	0.105	11.781
5.50488	0.165	0.216	0.106	11.736			4.39597	0.154	0.189	0.105	11.736
5.52617	0.166	0.217	0.107	11.691			4.41733	0.156	0.191	0.106	11.691
5.54745	0.166	0.217	0.108	11.646			4.43868	0.158	0.195	0.107	11.646
5.56874	0.166	0.219	0.108	11.601			4.46004	0.159	0.195	0.109	11.601
5.59002	0.167	0.219	0.107	11.557			4.4814	0.16	0.196	0.111	11.557
5.6113	0.167	0.22	0.109	11.513			4.50275	0.162	0.198	0.113	11.513
5.63258	0.167	0.221	0.107	11.47			4.5241	0.162	0.199	0.112	11.47
5.65386	0.167	0.221	0.109	11.427			4.54545	0.165	0.202	0.113	11.427
5.67514	0.167	0.219	0.108	11.384			4.5668	0.165	0.203	0.114	11.384
5.69641	0.168	0.221	0.109	11.342			4.58815	0.167	0.205	0.116	11.342
5.71768	0.168	0.219	0.11	11.299			4.6095	0.169	0.206	0.118	11.299
5.73896	0.169	0.224	0.109	11.258			4.63085	0.171	0.211	0.118	11.258
5.76023	0.169	0.222	0.11	11.216			4.65219	0.171	0.211	0.118	11.216
5.7815	0.17	0.224	0.11	11.175			4.67354	0.174	0.213	0.122	11.175
5.80276	0.17	0.225	0.111	11.134			4.69488	0.176	0.215	0.123	11.134
5.82403	0.17	0.225	0.109	11.093			4.71622	0.177	0.218	0.123	11.093
5.84529	0.171	0.225	0.112	11.053			4.73756	0.179	0.221	0.125	11.053
5.86655	0.172	0.227	0.112	11.013			4.7589	0.181	0.221	0.126	11.013
5.88781	0.172	0.225	0.112	10.973			4.78024	0.183	0.226	0.126	10.973
5.90907	0.173	0.228	0.113	10.934			4.80157	0.185	0.227	0.129	10.934
5.93033	0.173	0.23	0.112	10.895			4.82291	0.186	0.23	0.13	10.895
5.95159	0.175	0.231	0.114	10.856			4.84424	0.188	0.233	0.131	10.856
5.97284	0.174	0.23	0.113	10.817			4.86557	0.19	0.235	0.132	10.817
5.99409	0.176	0.232	0.114	10.779			4.8869	0.192	0.236	0.133	10.779
6.01534	0.176	0.233	0.114	10.741			4.90823	0.193	0.238	0.134	10.741
6.03659	0.177	0.236	0.115	10.703			4.92956	0.196	0.243	0.135	10.703
6.05784	0.177	0.234	0.117	10.665			4.95089	0.196	0.243	0.136	10.665
6.07909	0.178	0.235	0.117	10.628			4.97221	0.198	0.246	0.137	10.628
6.10033	0.18	0.238	0.116	10.591			4.99354	0.2	0.248	0.139	10.591
6.12157	0.18	0.238	0.117	10.555			5.01486	0.199	0.246	0.139	10.555
6.14281	0.181	0.24	0.12	10.518			5.03618	0.2	0.25	0.138	10.518
6.16405	0.181	0.24	0.119	10.482			5.0575	0.202	0.251	0.139	10.482
6.18529	0.183	0.244	0.119	10.446			5.07882	0.203	0.252	0.14	10.446
6.20653	0.184	0.245	0.121	10.41			5.10013	0.204	0.254	0.141	10.41
6.22776	0.186	0.247	0.122	10.375			5.12145	0.204	0.254	0.141	10.375
6.24899	0.187	0.248	0.122	10.34			5.14277	0.206	0.256	0.143	10.34
6.27022	0.187	0.25	0.122	10.305			5.16408	0.207	0.259	0.143	10.305
6.29145	0.188	0.25	0.123	10.27			5.18539	0.207	0.259	0.142	10.27
6.31268	0.19	0.254	0.124	10.235			5.2067	0.207	0.259	0.142	10.235
6.3339	0.191	0.256	0.124	10.201			5.22801	0.208	0.26	0.143	10.201
6.35513	0.193	0.258	0.125	10.167			5.24931	0.208	0.26	0.143	10.167
6.37635	0.193	0.26	0.126	10.133			5.27062	0.207	0.26	0.142	10.133
6.39757	0.194	0.261	0.127	10.1			5.29192	0.207	0.259	0.142	10.1
6.41879	0.197	0.264	0.128	10.066			5.31322	0.208	0.259	0.145	10.066
6.44	0.198	0.268	0.129	10.033			5.33453	0.208	0.261	0.142	10.033
6.46122	0.198	0.269	0.13	10			5.35582	0.208	0.26	0.143	10
6.48243	0.199	0.267	0.129	9.968			5.37712	0.207	0.26	0.143	9.968
6.50364	0.201	0.271	0.13	9.935			5.39842	0.208	0.26	0.142	9.935
6.52485	0.203	0.274	0.132	9.903			5.41971	0.206	0.258	0.143	9.903
6.54606	0.204	0.277	0.132	9.871			5.44101	0.206	0.259	0.142	9.871
6.56727	0.205	0.279	0.132	9.839			5.4623	0.206	0.258	0.142	9.839
6.58847	0.206	0.28	0.134	9.807			5.48359	0.204	0.258	0.141	9.807
6.60967	0.207	0.28	0.134	9.776			5.50488	0.206	0.26	0.141	9.776
6.63087	0.208	0.282	0.134	9.745			5.52617	0.204	0.255	0.14	9.745
6.65207	0.208	0.285	0.134	9.714			5.54745	0.203	0.257	0.139	9.714
6.67327	0.208	0.283	0.134	9.683			5.56874	0.204	0.256	0.14	9.683
6.69446	0.211	0.288	0.135	9.652			5.59002	0.204	0.256	0.14	9.652
6.71565	0.21	0.289	0.135	9.622			5.6113	0.202	0.254	0.14	9.622
6.73685	0.211	0.29	0.135	9.592			5.63258	0.202	0.254	0.138	9.592
6.75803	0.212	0.291	0.137	9.562			5.65386	0.202	0.256	0.139	9.562
6.77922	0.214	0.293	0.136	9.532			5.67514	0.204	0.261	0.138	9.532
6.80041	0.214	0.293	0.137	9.502			5.69641	0.204	0.262	0.14	9.502
6.82159	0.214	0.294	0.137	9.473			5.71768	0.201	0.254	0.139	9.473
6.84277	0.215	0.295	0.137	9.443			5.73896	0.199	0.25	0.139	9.443
6.86395	0.216	0.297	0.138	9.414			5.76023	0.2	0.25	0.14	9.414
6.88513	0.215	0.297	0.137	9.385			5.7815	0.198	0.247	0.138	9.385
6.90631	0.216	0.299	0.136	9.357			5.80276	0.198	0.247	0.139	9.357
6.92748	0.215	0.296	0.136	9.328			5.82403	0.199	0.247	0.14	9.328
6.94865	0.215	0.297	0.137	9.3			5.84529	0.198	0.247	0.139	9.3
6.96982	0.215	0.296	0.136	9.271			5.86655	0.199	0.248	0.14	9.271
6.99099	0.215	0.297	0.137	9.243			5.88781	0.198	0.246	0.139	9.243
7.01216	0.214	0.297	0.136	9.215			5.90907	0.197	0.245	0.139	9.215
7.03332	0.214	0.295	0.136	9.188			5.93033	0.198	0.246	0.141	9.188
7.05449	0.215	0.296	0.138	9.16			5.95159	0.198	0.248	0.14	9.16
7.07565	0.215	0.298	0.136	9.133			5.97284	0.198	0.247	0.14	9.133
7.09681	0.215	0.297	0.137	9.106			5.99409	0.2	0.252	0.141	9.106
7.11796	0.214	0.296	0.135	9.079			6.01534	0.2	0.25	0.141	9.079
7.13912	0.214	0.296	0.137	9.052			6.03659	0.198	0.246	0.139	9.052
7.16027	0.214	0.296	0.136	9.025			6.05784	0.197	0.244	0.14	9.025
7.18142	0.214	0.295	0.137	8.999			6.07909	0.198	0.244	0.142	8.999
7.20257	0.213	0.294	0.137	8.972			6.10033	0.197	0.244	0.14	8.972
7.22372	0.213	0.294	0.135	8.946			6.12157	0.197	0.245	0.141	8.946
7.24487	0.213	0.294	0.135	8.92			6.14281	0.198	0.244	0.142	8.92
7.26601	0.213	0.294	0.135	8.894			6.16405	0.198	0.244	0.142	8.894
7.28715	0.213	0.294	0.135	8.868			6.18529	0.198	0.245	0.141	8.868
7.30829	0.212	0.293	0.135	8.843			6.20653	0.198	0.245	0.141	8.843
7.32943	0.212	0.292	0.136	8.817			6.22776	0.198	0.246	0.142	8.817
7.35056	0.212	0.291	0.137	8.792			6.24899	0.197	0.243	0.141	8.792
7.3717	0.211	0.291	0.135	8.767			6.27022	0.198	0.243	0.142	8.767
7.39283	0.212	0.292	0.136	8.742			6.29145	0.198	0.243	0.141	8.742
7.41396	0.212	0.293	0.135	8.717			6.31268	0.199	0.245	0.142	8.717
7.43508	0.213	0.294	0.137	8.692			6.3339	0.198	0.245	0.141	8.692
7.45621	0.212	0.293	0.136	8.667			6.35513	0.198	0.245	0.142	8.667
7.47733	0.211	0.291	0.136	8.643			6.37635	0.198	0.245	0.142	8.643
7.49845	0.212	0.292	0.136	8.619			6.39757	0.198	0.244	0.142	8.619
7.51957	0.211	0.291	0.136	8.594			6.41879	0.198	0.243	0.143	8.594
7.54069	0.213	0.292	0.138	8.57			6.44	0.198	0.244	0.142	8.57
7.5618	0.212	0.291	0.138	8.546			6.46122	0.198	0.245	0.143	8.546
7.58292	0.212	0.291	0.139	8.523			6.48243	0.197	0.243	0.141	8.523
7.60403	0.212	0.291	0.138	8.499			6.50364	0.197	0.243	0.141	8.499
7.62513	0.212	0.291	0.138	8.476			6.52485	0.197	0.244	0.142	8.476
7.64624	0.211	0.29	0.138	8.452			6.54606	0.197	0.243	0.141	8.452
7.66735	0.212	0.291	0.137	8.429			6.56727	0.196	0.241	0.142	8.429
7.68845	0.212	0.29	0.137	8.406			6.58847	0.196	0.242	0.141	8.406
7.70955	0.213	0.291	0.139	8.383			6.60967	0.196	0.241	0.141	8.383
7.73065	0.213	0.291	0.139	8.36			6.63087	0.196	0.241	0.14	8.36
7.75174	0.211	0.289	0.139	8.337			6.65207	0.195	0.241	0.14	8.337
7.77284	0.212	0.29	0.138	8.315			6.67327	0.195	0.242	0.14	8.315
7.79393	0.211	0.289	0.139	8.292			6.69446	0.195	0.241	0.14	8.292
7.81502	0.211	0.289	0.138	8.27			6.71565	0.195	0.24	0.14	8.27
7.83611	0.211	0.288	0.137	8.248			6.73685	0.195	0.24	0.14	8.248
7.85719	0.21	0.286	0.139	8.226			6.75803	0.194	0.239	0.14	8.226
7.87827	0.21	0.286	0.138	8.204			6.77922	0.195	0.241	0.14	8.204
7.89936	0.209	0.284	0.139	8.182			6.80041	0.194	0.24	0.139	8.182
7.92043	0.209	0.284	0.138	8.16			6.82159	0.194	0.24	0.141	8.16
7.94151	0.209	0.285	0.138	8.138			6.84277	0.194	0.239	0.14	8.138
7.96259	0.209	0.284	0.138	8.117			6.86395	0.195	0.241	0.14	8.117
7.98366	0.208	0.281	0.137	8.096			6.88513	0.195	0.24	0.141	8.096
8.00473	0.208	0.284	0.136	8.074			6.90631	0.195	0.24	0.142	8.074
8.0258	0.206	0.281	0.136	8.053			6.92748	0.195	0.24	0.141	8.053
8.04686	0.205	0.278	0.135	8.032			6.94865	0.195	0.24	0.141	8.032
8.06793	0.205	0.277	0.137	8.011			6.96982	0.195	0.24	0.141	8.011
8.08899	0.202	0.273	0.135	7.99			6.99099	0.194	0.238	0.141	7.99
8.11005	0.202	0.271	0.135	7.97			7.01216	0.195	0.241	0.142	7.97
8.13111	0.201	0.27	0.134	7.949			7.03332	0.196	0.242	0.142	7.949
8.15216	0.2	0.269	0.132	7.928			7.05449	0.197	0.243	0.144	7.928
8.17321	0.199	0.268	0.133	7.908			7.07565	0.197	0.243	0.143	7.908
8.19426	0.199	0.268	0.133	7.888			7.09681	0.197	0.242	0.144	7.888
8.21531	0.197	0.263	0.133	7.868			7.11796	0.197	0.243	0.143	7.868
8.23636	0.196	0.262	0.132	7.848			7.13912	0.197	0.243	0.144	7.848
8.2574	0.194	0.259	0.131	7.828			7.16027	0.198	0.245	0.144	7.828
8.27844	0.193	0.256	0.131	7.808			7.18142	0.199	0.244	0.144	7.808
8.29948	0.191	0.254	0.131	7.788			7.20257	0.199	0.246	0.145	7.788
8.32052	0.191	0.253	0.131	7.768			7.22372	0.199	0.245	0.145	7.768
8.34155	0.19	0.252	0.129	7.749			7.24487	0.199	0.247	0.145	7.749
8.36259	0.188	0.248	0.129	7.729			7.26601	0.199	0.247	0.146	7.729
8.38362	0.187	0.247	0.129	7.71			7.28715	0.2	0.247	0.146	7.71
8.40465	0.186	0.244	0.128	7.691			7.30829	0.2	0.248	0.145	7.691
8.42567	0.184	0.241	0.128	7.672			7.32943	0.2	0.247	0.144	7.672
8.4467	0.183	0.239	0.127	7.652			7.35056	0.2	0.247	0.145	7.652
8.46772	0.182	0.237	0.127	7.634			7.3717	0.201	0.249	0.147	7.634
8.48874	0.181	0.235	0.129	7.615			7.39283	0.201	0.248	0.146	7.615
8.50975	0.181	0.234	0.127	7.596			7.41396	0.201	0.248	0.146	7.596
8.53077	0.179	0.231	0.126	7.577			7.43508	0.202	0.25	0.147	7.577
8.55178	0.179	0.231	0.127	7.559			7.45621	0.202	0.249	0.147	7.559
8.57279	0.176	0.227	0.125	7.54			7.47733	0.202	0.25	0.147	7.54
8.59379	0.176	0.225	0.125	7.522			7.49845	0.201	0.25	0.147	7.522
8.6148	0.175	0.227	0.125	7.503			7.51957	0.202	0.25	0.147	7.503
8.6358	0.175	0.224	0.124	7.485			7.54069	0.202	0.25	0.146	7.485
8.6568	0.174	0.222	0.125	7.467			7.5618	0.201	0.25	0.146	7.467
8.6778	0.174	0.222	0.124	7.449			7.58292	0.202	0.249	0.147	7.449
8.6988	0.173	0.22	0.124	7.431			7.60403	0.201	0.249	0.147	7.431
8.71979	0.173	0.219	0.125	7.413			7.62513	0.201	0.249	0.145	7.413
8.74078	0.172	0.219	0.126	7.396			7.64624	0.201	0.249	0.146	7.396
8.76177	0.171	0.216	0.125	7.378			7.66735	0.201	0.249	0.146	7.378
8.78276	0.171	0.217	0.124	7.36			7.68845	0.2	0.247	0.146	7.36
8.80374	0.171	0.216	0.124	7.343			7.70955	0.2	0.248	0.145	7.343
8.82472	0.17	0.213	0.125	7.325			7.73065	0.2	0.248	0.146	7.325
8.8457	0.17	0.213	0.125	7.308			7.75174	0.2	0.247	0.146	7.308
8.86668	0.17	0.214	0.123	7.291			7.77284	0.2	0.247	0.146	7.291
8.88765	0.17	0.214	0.125	7.274			7.79393	0.199	0.246	0.146	7.274
8.90862	0.17	0.213	0.125	7.256			7.81502	0.199	0.246	0.145	7.256
8.92959	0.169	0.212	0.125	7.239			7.83611	0.198	0.246	0.144	7.239
8.95056	0.17	0.211	0.126	7.223			7.85719	0.198	0.245	0.145	7.223
8.97152	0.169	0.213	0.124	7.206			7.87827	0.198	0.246	0.144	7.206
8.99249	0.169	0.211	0.124	7.189			7.89936	0.197	0.244	0.143	7.189
9.01344	0.168	0.21	0.125	7.172			7.92043	0.197	0.243	0.144	7.172
9.0344	0.169	0.21	0.125	7.156			7.94151	0.197	0.243	0.144	7.156
9.05536	0.168	0.21	0.125	7.139			7.96259	0.196	0.242	0.144	7.139
9.07631	0.169	0.21	0.126	7.123			7.98366	0.196	0.244	0.143	7.123
9.09726	0.168	0.209	0.125	7.106			8.00473	0.196	0.243	0.144	7.106
9.11821	0.168	0.209	0.126	7.09			8.0258	0.196	0.241	0.145	7.09
9.13915	0.17	0.212	0.126	7.074			8.04686	0.196	0.241	0.146	7.074
9.16009	0.169	0.21	0.126	7.058			8.06793	0.194	0.238	0.144	7.058
9.18104	0.169	0.211	0.126	7.042			8.08899	0.194	0.24	0.143	7.042
9.20197	0.169	0.21	0.126	7.026			8.11005	0.194	0.239	0.145	7.026
9.22291	0.17	0.211	0.126	7.01			8.13111	0.194	0.238	0.143	7.01
9.24384	0.168	0.209	0.126	6.994			8.15216	0.194	0.238	0.144	6.994
9.26477	0.169	0.211	0.126	6.978			8.17321	0.193	0.237	0.143	6.978
9.2857	0.169	0.21	0.127	6.962			8.19426	0.194	0.239	0.142	6.962
9.30662	0.169	0.21	0.126	6.947			8.21531	0.192	0.236	0.142	6.947
9.32755	0.168	0.21	0.125	6.931			8.23636	0.192	0.236	0.142	6.931
9.34847	0.169	0.211	0.126	6.916			8.2574	0.192	0.236	0.143	6.916
9.36938	0.169	0.211	0.126	6.9			8.27844	0.191	0.235	0.141	6.9
9.3903	0.169	0.21	0.127	6.885			8.29948	0.19	0.232	0.141	6.885
9.41121	0.169	0.21	0.126	6.87			8.32052	0.192	0.234	0.142	6.87
9.43212	0.17	0.211	0.127	6.855			8.34155	0.19	0.233	0.141	6.855
9.45303	0.169	0.209	0.126	6.839			8.36259	0.19	0.232	0.142	6.839
9.47394	0.168	0.208	0.126	6.824			8.38362	0.19	0.233	0.141	6.824
9.49484	0.169	0.209	0.127	6.809			8.40465	0.189	0.23	0.142	6.809
9.51574	0.169	0.21	0.127	6.794			8.42567	0.189	0.23	0.141	6.794
9.53664	0.168	0.209	0.126	6.78			8.4467	0.19	0.231	0.142	6.78
9.55753	0.169	0.209	0.127	6.765			8.46772	0.188	0.23	0.14	6.765
9.57842	0.169	0.209	0.126	6.75			8.48874	0.187	0.229	0.141	6.75
9.59931	0.168	0.209	0.127	6.735			8.50975	0.187	0.227	0.141	6.735
9.6202	0.168	0.208	0.126	6.721			8.53077	0.187	0.227	0.141	6.721
9.64108	0.167	0.207	0.126	6.706			8.55178	0.186	0.226	0.139	6.706
9.66197	0.169	0.209	0.128	6.692			8.57279	0.185	0.225	0.139	6.692
9.68285	0.168	0.209	0.126	6.677			8.59379	0.185	0.224	0.139	6.677
9.70372	0.168	0.208	0.126	6.663			8.6148	0.185	0.225	0.14	6.663
9.7246	0.167	0.208	0.126	6.649			8.6358	0.185	0.223	0.14	6.649
9.74547	0.167	0.207	0.126	6.635			8.6568	0.183	0.222	0.14	6.635
9.76634	0.168	0.207	0.127	6.621			8.6778	0.183	0.223	0.139	6.621
9.7872	0.167	0.206	0.126	6.606			8.6988	0.182	0.221	0.138	6.606
9.80807	0.167	0.205	0.128	6.592			8.71979	0.182	0.22	0.138	6.592
9.82893	0.166	0.205	0.125	6.578			8.74078	0.181	0.219	0.139	6.578
9.84979	0.168	0.206	0.127	6.565			8.76177	0.182	0.219	0.139	6.565
9.87064	0.168	0.206	0.128	6.551			8.78276	0.18	0.217	0.138	6.551
9.8915	0.167	0.205	0.128	6.537			8.80374	0.18	0.217	0.138	6.537
9.91235	0.166	0.205	0.127	6.523			8.82472	0.179	0.215	0.137	6.523
9.93319	0.167	0.205	0.127	6.51			8.8457	0.179	0.214	0.136	6.51
9.95404	0.167	0.204	0.127	6.496			8.86668	0.178	0.214	0.137	6.496
9.97488	0.166	0.203	0.127	6.482			8.88765	0.178	0.214	0.136	6.482
9.99572	0.167	0.206	0.127	6.469			8.90862	0.177	0.213	0.136	6.469
10.0166	0.166	0.203	0.127	6.456			8.92959	0.176	0.213	0.135	6.456
10.0374	0.166	0.203	0.127	6.442			8.95056	0.176	0.211	0.136	6.442
10.0582	0.165	0.203	0.126	6.429			8.97152	0.176	0.212	0.136	6.429
10.0791	0.166	0.203	0.127	6.416			8.99249	0.176	0.21	0.136	6.416
10.0999	0.166	0.204	0.127	6.402			9.01344	0.175	0.209	0.136	6.402
10.1207	0.167	0.204	0.128	6.389			9.0344	0.175	0.208	0.136	6.389
10.1415	0.165	0.202	0.127	6.376			9.05536	0.174	0.208	0.135	6.376
10.1623	0.165	0.201	0.128	6.363			9.07631	0.174	0.208	0.135	6.363
10.1832	0.166	0.203	0.127	6.35			9.09726	0.174	0.209	0.135	6.35
10.204	0.166	0.202	0.128	6.337			9.11821	0.173	0.206	0.135	6.337
10.2248	0.166	0.202	0.127	6.324			9.13915	0.173	0.206	0.134	6.324
10.2456	0.166	0.202	0.127	6.312			9.16009	0.173	0.205	0.134	6.312
10.2664	0.166	0.203	0.128	6.299			9.18104	0.173	0.206	0.135	6.299
10.2872	0.166	0.201	0.128	6.286			9.20197	0.173	0.205	0.135	6.286
10.308	0.166	0.201	0.128	6.273			9.22291	0.173	0.205	0.136	6.273
10.3288	0.166	0.203	0.129	6.261			9.24384	0.172	0.204	0.135	6.261
10.3496	0.166	0.202	0.128	6.248			9.26477	0.173	0.204	0.135	6.248
10.3704	0.166	0.201	0.13	6.236			9.2857	0.172	0.203	0.135	6.236
10.3912	0.166	0.201	0.128	6.223			9.30662	0.173	0.204	0.136	6.223
10.4119	0.166	0.202	0.129	6.211			9.32755	0.172	0.204	0.135	6.211
10.4327	0.166	0.201	0.128	6.199			9.34847	0.173	0.204	0.136	6.199
10.4535	0.166	0.201	0.13	6.186			9.36938	0.172	0.203	0.135	6.186
10.4743	0.166	0.201	0.129	6.174			9.3903	0.173	0.203	0.136	6.174
10.4951	0.166	0.201	0.129	6.162			9.41121	0.172	0.202	0.136	6.162
10.5158	0.166	0.201	0.128	6.15			9.43212	0.172	0.203	0.136	6.15
10.5366	0.167	0.201	0.131	6.138			9.45303	0.172	0.203	0.136	6.138
10.5574	0.167	0.203	0.129	6.126			9.47394	0.173	0.202	0.137	6.126
10.5781	0.167	0.201	0.13	6.114			9.49484	0.172	0.202	0.136	6.114
10.5989	0.167	0.201	0.131	6.102			9.51574	0.172	0.202	0.137	6.102
10.6197	0.167	0.201	0.13	6.09			9.53664	0.173	0.202	0.138	6.09
10.6404	0.167	0.202	0.13	6.078			9.55753	0.173	0.203	0.138	6.078
10.6612	0.167	0.202	0.131	6.066			9.57842	0.173	0.203	0.138	6.066
10.6819	0.168	0.202	0.132	6.054			9.59931	0.173	0.203	0.137	6.054
10.7027	0.167	0.202	0.131	6.043			9.6202	0.174	0.203	0.138	6.043
10.7234	0.167	0.202	0.13	6.031			9.64108	0.173	0.202	0.139	6.031
10.7441	0.168	0.203	0.132	6.02			9.66197	0.173	0.201	0.138	6.02
10.7649	0.168	0.203	0.132	6.008			9.68285	0.174	0.203	0.138	6.008
10.7856	0.168	0.204	0.131	5.996			9.70372	0.174	0.204	0.139	5.996
10.8064	0.168	0.203	0.131	5.985			9.7246	0.173	0.203	0.138	5.985
10.8271	0.168	0.203	0.132	5.974			9.74547	0.174	0.204	0.139	5.974
10.8478	0.167	0.202	0.131	5.962			9.76634	0.174	0.203	0.138	5.962
10.8685	0.169	0.204	0.132	5.951			9.7872	0.175	0.204	0.14	5.951
10.8893	0.168	0.202	0.132	5.94			9.80807	0.174	0.204	0.14	5.94
10.91	0.17	0.204	0.136	5.928			9.82893	0.177	0.205	0.143	5.928
10.9307	0.171	0.203	0.14	5.917			9.84979	0.178	0.204	0.147	5.917
10.9514	0.173	0.203	0.143	5.906			9.87064	0.179	0.204	0.151	5.906
10.9721	0.174	0.203	0.147	5.895			9.8915	0.18	0.202	0.154	5.895
10.9928	0.174	0.202	0.147	5.884			9.91235	0.181	0.203	0.157	5.884
11.0135	0.176	0.203	0.149	5.873			9.93319	0.183	0.204	0.158	5.873
11.0342	0.176	0.203	0.151	5.862			9.95404	0.183	0.205	0.159	5.862
11.0549	0.178	0.204	0.151	5.851			9.97488	0.184	0.206	0.159	5.851
11.0756	0.178	0.203	0.153	5.84			9.99572	0.184	0.205	0.16	5.84
11.0963	0.178	0.204	0.152	5.829			10.0166	0.185	0.205	0.161	5.829
11.117	0.177	0.204	0.148	5.818			10.0374	0.184	0.205	0.155	5.818
11.1377	0.176	0.204	0.143	5.807			10.0582	0.182	0.206	0.15	5.807
11.1584	0.175	0.203	0.139	5.797			10.0791	0.181	0.206	0.146	5.797
11.179	0.174	0.204	0.136	5.786			10.0999	0.181	0.206	0.144	5.786
11.1997	0.174	0.205	0.134	5.775			10.1207	0.18	0.206	0.142	5.775
11.2204	0.173	0.204	0.133	5.765			10.1415	0.18	0.207	0.141	5.765
11.241	0.173	0.204	0.132	5.754			10.1623	0.18	0.206	0.14	5.754
11.2617	0.173	0.205	0.133	5.744			10.1832	0.179	0.206	0.139	5.744
11.2824	0.172	0.203	0.133	5.733			10.204	0.18	0.208	0.141	5.733
11.3031	0.172	0.204	0.133	5.723			10.2248	0.179	0.206	0.141	5.723
11.3237	0.172	0.202	0.135	5.712			10.2456	0.179	0.206	0.142	5.712
11.3444	0.171	0.202	0.135	5.702			10.2664	0.179	0.207	0.142	5.702
11.365	0.171	0.204	0.136	5.692			10.2872	0.179	0.208	0.143	5.692
11.3857	0.17	0.202	0.134	5.681			10.308	0.179	0.207	0.144	5.681
11.4063	0.17	0.201	0.136	5.671			10.3288	0.179	0.209	0.144	5.671
11.427	0.17	0.203	0.136	5.661			10.3496	0.179	0.208	0.144	5.661
11.4476	0.17	0.202	0.137	5.651			10.3704	0.179	0.21	0.144	5.651
11.4682	0.17	0.201	0.138	5.641			10.3912	0.179	0.208	0.144	5.641
11.4889	0.169	0.2	0.138	5.631			10.4119	0.179	0.209	0.145	5.631
11.5095	0.17	0.201	0.138	5.62			10.4327	0.18	0.21	0.146	5.62
11.5301	0.17	0.201	0.138	5.61			10.4535	0.179	0.208	0.146	5.61
11.5508	0.171	0.203	0.14	5.6			10.4743	0.179	0.208	0.147	5.6
11.5714	0.171	0.204	0.139	5.59			10.4951	0.18	0.209	0.147	5.59
11.592	0.171	0.204	0.139	5.581			10.5158	0.18	0.21	0.149	5.581
11.6126	0.172	0.205	0.141	5.571			10.5366	0.18	0.212	0.148	5.571
11.6332	0.172	0.204	0.142	5.561			10.5574	0.181	0.212	0.15	5.561
11.6538	0.171	0.204	0.141	5.551			10.5781	0.181	0.212	0.15	5.551
11.6745	0.172	0.204	0.144	5.541			10.5989	0.181	0.213	0.15	5.541
11.6951	0.172	0.206	0.142	5.532			10.6197	0.181	0.211	0.151	5.532
11.7157	0.173	0.206	0.144	5.522			10.6404	0.182	0.214	0.151	5.522
11.7363	0.173	0.205	0.144	5.512			10.6612	0.184	0.215	0.153	5.512
11.7569	0.173	0.206	0.144	5.503			10.6819	0.183	0.215	0.152	5.503
11.7774	0.174	0.206	0.144	5.493			10.7027	0.184	0.214	0.154	5.493
11.798	0.175	0.208	0.146	5.483			10.7234	0.184	0.218	0.153	5.483
11.8186	0.175	0.208	0.146	5.474			10.7441	0.185	0.216	0.155	5.474
11.8392	0.176	0.208	0.148	5.464			10.7649	0.185	0.218	0.155	5.464
11.8598	0.176	0.208	0.148	5.455			10.7856	0.185	0.217	0.155	5.455
11.8804	0.177	0.211	0.148	5.446			10.8064	0.186	0.219	0.157	5.446
11.9009	0.177	0.211	0.15	5.436			10.8271	0.187	0.218	0.157	5.436
11.9215	0.177	0.21	0.151	5.427			10.8478	0.187	0.218	0.158	5.427
11.9421	0.178	0.213	0.151	5.418			10.8685	0.188	0.222	0.159	5.418
11.9626	0.179	0.215	0.152	5.408			10.8893	0.188	0.22	0.16	5.408
11.9832	0.18	0.214	0.153	5.399			10.91	0.189	0.221	0.161	5.399
12.0038	0.18	0.216	0.153	5.39			10.9307	0.189	0.221	0.161	5.39
12.0243	0.181	0.216	0.154	5.381			10.9514	0.19	0.224	0.162	5.381
12.0449	0.183	0.219	0.155	5.371			10.9721	0.192	0.222	0.163	5.371
12.0654	0.184	0.222	0.156	5.362			10.9928	0.193	0.226	0.164	5.362
12.086	0.186	0.221	0.157	5.353			11.0135	0.194	0.227	0.164	5.353
12.1065	0.188	0.225	0.157	5.344			11.0342	0.195	0.226	0.164	5.344
12.127	0.19	0.229	0.158	5.335			11.0549	0.196	0.228	0.164	5.335
12.1476	0.191	0.231	0.159	5.326			11.0756	0.198	0.231	0.166	5.326
12.1681	0.193	0.235	0.16	5.317			11.0963	0.198	0.228	0.167	5.317
12.1886	0.195	0.238	0.161	5.308			11.117	0.2	0.232	0.167	5.308
12.2092	0.197	0.239	0.163	5.299			11.1377	0.201	0.233	0.168	5.299
12.2297	0.198	0.241	0.163	5.291			11.1584	0.202	0.234	0.17	5.291
12.2502	0.198	0.241	0.164	5.282			11.179	0.203	0.235	0.169	5.282
12.2707	0.2	0.245	0.164	5.273			11.1997	0.204	0.235	0.171	5.273
12.2912	0.202	0.247	0.164	5.264			11.2204	0.206	0.238	0.172	5.264
12.3117	0.202	0.248	0.166	5.255			11.241	0.207	0.24	0.173	5.255
12.3323	0.204	0.249	0.167	5.247			11.2617	0.207	0.238	0.173	5.247
12.3528	0.206	0.253	0.168	5.238			11.2824	0.21	0.242	0.175	5.238
12.3733	0.206	0.253	0.169	5.229			11.3031	0.21	0.242	0.175	5.229
12.3938	0.208	0.255	0.171	5.221			11.3237	0.211	0.244	0.176	5.221
12.4142	0.209	0.256	0.172	5.212			11.3444	0.212	0.245	0.177	5.212
12.4347	0.21	0.257	0.173	5.204			11.365	0.214	0.247	0.179	5.204
12.4552	0.211	0.258	0.172	5.195			11.3857	0.214	0.247	0.18	5.195
12.4757	0.213	0.262	0.173	5.187			11.4063	0.216	0.249	0.179	5.187
12.4962	0.214	0.263	0.174	5.178			11.427	0.217	0.25	0.181	5.178
12.5167	0.215	0.264	0.176	5.17			11.4476	0.219	0.251	0.182	5.17
12.5372	0.216	0.266	0.177	5.161			11.4682	0.219	0.253	0.184	5.161
12.5576	0.218	0.267	0.178	5.153			11.4889	0.22	0.254	0.185	5.153
12.5781	0.219	0.269	0.179	5.145			11.5095	0.222	0.255	0.186	5.145
12.5985	0.22	0.271	0.179	5.136			11.5301	0.222	0.255	0.186	5.136
12.619	0.222	0.272	0.182	5.128			11.5508	0.224	0.257	0.187	5.128
12.6395	0.222	0.273	0.182	5.12			11.5714	0.225	0.258	0.189	5.12
12.6599	0.224	0.274	0.184	5.112			11.592	0.227	0.261	0.19	5.112
12.6804	0.225	0.277	0.185	5.103			11.6126	0.228	0.263	0.192	5.103
12.7008	0.226	0.276	0.185	5.095			11.6332	0.229	0.264	0.192	5.095
12.7213	0.228	0.28	0.187	5.087			11.6538	0.23	0.265	0.194	5.087
12.7417	0.228	0.277	0.189	5.079			11.6745	0.232	0.266	0.196	5.079
12.7622	0.228	0.279	0.189	5.071			11.6951	0.232	0.267	0.195	5.071
12.7826	0.23	0.28	0.191	5.063			11.7157	0.234	0.269	0.198	5.063
12.803	0.23	0.28	0.191	5.055			11.7363	0.235	0.27	0.198	5.055
12.8235	0.232	0.283	0.193	5.047			11.7569	0.236	0.27	0.199	5.047
12.8439	0.232	0.282	0.194	5.039			11.7774	0.238	0.273	0.202	5.039
12.8643	0.234	0.285	0.194	5.031			11.798	0.239	0.275	0.203	5.031
12.8847	0.234	0.284	0.195	5.023			11.8186	0.241	0.276	0.204	5.023
12.9051	0.235	0.286	0.196	5.015			11.8392	0.242	0.277	0.206	5.015
12.9255	0.237	0.288	0.199	5.007			11.8598	0.243	0.278	0.206	5.007
12.946	0.237	0.288	0.199	4.999			11.8804	0.244	0.281	0.207	4.999
12.9664	0.238	0.287	0.199	4.991			11.9009	0.246	0.28	0.209	4.991
12.9868	0.239	0.288	0.2	4.983			11.9215	0.247	0.282	0.209	4.983
13.0072	0.241	0.29	0.203	4.976			11.9421	0.248	0.284	0.212	4.976
13.0276	0.241	0.29	0.203	4.968			11.9626	0.25	0.286	0.212	4.968
13.048	0.242	0.29	0.205	4.96			11.9832	0.251	0.288	0.212	4.96
13.0684	0.243	0.291	0.207	4.952			12.0038	0.252	0.289	0.215	4.952
13.0887	0.245	0.291	0.208	4.945			12.0243	0.254	0.29	0.216	4.945
13.1091	0.245	0.29	0.209	4.937			12.0449	0.255	0.29	0.218	4.937
13.1295	0.246	0.29	0.211	4.929			12.0654	0.257	0.293	0.219	4.929
13.1499	0.247	0.29	0.213	4.922			12.086	0.258	0.295	0.221	4.922
13.1702	0.249	0.291	0.217	4.914			12.1065	0.26	0.296	0.222	4.914
13.1906	0.25	0.29	0.218	4.907			12.127	0.261	0.297	0.223	4.907
13.211	0.252	0.29	0.221	4.899			12.1476	0.264	0.298	0.227	4.899
13.2313	0.255	0.293	0.226	4.892			12.1681	0.266	0.3	0.23	4.892
13.2517	0.257	0.293	0.23	4.884			12.1886	0.268	0.301	0.232	4.884
13.2721	0.259	0.292	0.235	4.877			12.2092	0.271	0.303	0.237	4.877
13.2924	0.262	0.294	0.24	4.869			12.2297	0.274	0.304	0.241	4.869
13.3127	0.265	0.293	0.246	4.862			12.2502	0.277	0.306	0.244	4.862
13.3331	0.269	0.294	0.254	4.855			12.2707	0.281	0.308	0.25	4.855
13.3534	0.275	0.295	0.266	4.847			12.2912	0.284	0.309	0.255	4.847
13.3738	0.28	0.296	0.278	4.84			12.3117	0.29	0.312	0.263	4.84
13.3941	0.286	0.296	0.29	4.833			12.3323	0.296	0.317	0.271	4.833
13.4144	0.293	0.297	0.306	4.825			12.3528	0.302	0.317	0.281	4.825
13.4348	0.302	0.299	0.324	4.818			12.3733	0.309	0.323	0.291	4.818
13.4551	0.311	0.301	0.343	4.811			12.3938	0.317	0.325	0.306	4.811
13.4754	0.323	0.304	0.367	4.803			12.4142	0.325	0.328	0.319	4.803
13.4957	0.332	0.305	0.388	4.796			12.4347	0.335	0.332	0.336	4.796
13.516	0.344	0.308	0.413	4.789			12.4552	0.346	0.338	0.353	4.789
13.5364	0.356	0.309	0.438	4.782			12.4757	0.356	0.34	0.37	4.782
13.5567	0.37	0.311	0.467	4.775			12.4962	0.369	0.345	0.39	4.775
13.577	0.384	0.314	0.495	4.768			12.5167	0.38	0.348	0.41	4.768
13.5973	0.396	0.314	0.525	4.761			12.5372	0.393	0.355	0.429	4.761
13.6176	0.41	0.318	0.55	4.754			12.5576	0.403	0.357	0.447	4.754
13.6379	0.423	0.321	0.578	4.747			12.5781	0.417	0.362	0.468	4.747
13.6581	0.435	0.323	0.603	4.74			12.5985	0.427	0.369	0.483	4.74
13.6784	0.449	0.326	0.629	4.733			12.619	0.437	0.373	0.5	4.733
13.6987	0.459	0.328	0.648	4.726			12.6395	0.447	0.377	0.514	4.726
13.719	0.469	0.332	0.667	4.719			12.6599	0.456	0.382	0.529	4.719
13.7393	0.478	0.333	0.684	4.712			12.6804	0.465	0.386	0.541	4.712
13.7596	0.486	0.339	0.694	4.705			12.7008	0.473	0.392	0.553	4.705
13.7798	0.493	0.34	0.706	4.698			12.7213	0.481	0.396	0.564	4.698
13.8001	0.497	0.342	0.712	4.691			12.7417	0.485	0.398	0.567	4.691
13.8203	0.502	0.345	0.718	4.684			12.7622	0.49	0.402	0.575	4.684
13.8406	0.505	0.345	0.723	4.677			12.7826	0.493	0.405	0.578	4.677
13.8608	0.508	0.349	0.726	4.671			12.803	0.494	0.406	0.58	4.671
13.8811	0.509	0.35	0.725	4.664			12.8235	0.496	0.408	0.579	4.664
13.9014	0.51	0.353	0.724	4.657			12.8439	0.497	0.411	0.579	4.657
13.9216	0.509	0.353	0.719	4.65			12.8643	0.495	0.413	0.574	4.65
13.9418	0.51	0.355	0.717	4.644			12.8847	0.494	0.411	0.571	4.644
13.9621	0.507	0.356	0.708	4.637			12.9051	0.491	0.414	0.563	4.637
13.9823	0.505	0.358	0.701	4.63			12.9255	0.488	0.414	0.555	4.63
14.0025	0.502	0.357	0.692	4.624			12.946	0.484	0.411	0.548	4.624
14.0228	0.496	0.356	0.678	4.617			12.9664	0.48	0.411	0.542	4.617
14.043	0.491	0.356	0.666	4.61			12.9868	0.475	0.412	0.532	4.61
14.0632	0.485	0.357	0.654	4.604			13.0072	0.472	0.411	0.526	4.604
14.0834	0.48	0.357	0.641	4.597			13.0276	0.468	0.411	0.517	4.597
14.1036	0.474	0.356	0.626	4.591			13.048	0.465	0.41	0.512	4.591
14.1238	0.468	0.358	0.611	4.584			13.0684	0.46	0.408	0.502	4.584
14.144	0.462	0.356	0.598	4.577			13.0887	0.457	0.407	0.5	4.577
14.1642	0.455	0.353	0.584	4.571			13.1091	0.453	0.406	0.494	4.571
14.1844	0.45	0.354	0.572	4.565			13.1295	0.45	0.403	0.489	4.565
14.2046	0.444	0.352	0.56	4.558			13.1499	0.447	0.402	0.486	4.558
14.2248	0.439	0.352	0.551	4.552			13.1702	0.445	0.401	0.482	4.552
14.245	0.434	0.352	0.539	4.545			13.1906	0.441	0.397	0.476	4.545
14.2652	0.429	0.35	0.528	4.539			13.211	0.439	0.396	0.473	4.539
14.2854	0.425	0.348	0.52	4.532			13.2313	0.435	0.394	0.468	4.532
14.3056	0.42	0.348	0.511	4.526			13.2517	0.433	0.392	0.465	4.526
14.3257	0.416	0.345	0.503	4.52			13.2721	0.429	0.389	0.461	4.52
14.3459	0.411	0.345	0.494	4.513			13.2924	0.426	0.389	0.456	4.513
14.3661	0.408	0.345	0.488	4.507			13.3127	0.422	0.386	0.451	4.507
14.3862	0.403	0.344	0.476	4.501			13.3331	0.42	0.384	0.446	4.501
14.4064	0.399	0.343	0.468	4.495			13.3534	0.416	0.383	0.438	4.495
14.4265	0.394	0.342	0.46	4.488			13.3738	0.412	0.382	0.434	4.488
14.4467	0.39	0.339	0.451	4.482			13.3941	0.407	0.38	0.427	4.482
14.4668	0.385	0.339	0.441	4.476			13.4144	0.405	0.379	0.422	4.476
14.487	0.381	0.337	0.434	4.47			13.4348	0.399	0.375	0.415	4.47
14.5071	0.377	0.336	0.425	4.464			13.4551	0.396	0.374	0.409	4.464
14.5273	0.373	0.336	0.419	4.457			13.4754	0.391	0.37	0.402	4.457
14.5474	0.37	0.336	0.412	4.451			13.4957	0.387	0.369	0.396	4.451
14.5675	0.365	0.335	0.402	4.445			13.516	0.383	0.369	0.39	4.445
14.5876	0.362	0.333	0.397	4.439			13.5364	0.378	0.364	0.383	4.439
14.6077	0.358	0.332	0.389	4.433			13.5567	0.374	0.363	0.376	4.433
14.6279	0.355	0.332	0.382	4.427			13.577	0.37	0.36	0.371	4.427
14.648	0.351	0.33	0.377	4.421			13.5973	0.365	0.357	0.365	4.421
14.6681	0.349	0.329	0.372	4.415			13.6176	0.361	0.355	0.358	4.415
14.6882	0.345	0.328	0.366	4.409			13.6379	0.357	0.353	0.352	4.409
14.7083	0.343	0.329	0.362	4.403			13.6581	0.353	0.351	0.347	4.403
14.7284	0.341	0.327	0.357	4.397			13.6784	0.349	0.349	0.34	4.397
14.7485	0.337	0.325	0.352	4.391			13.6987	0.345	0.345	0.335	4.391
14.7686	0.336	0.324	0.349	4.385			13.719	0.341	0.343	0.329	4.385
14.7887	0.334	0.325	0.344	4.379			13.7393	0.338	0.342	0.326	4.379
14.8088	0.331	0.322	0.341	4.373			13.7596	0.335	0.339	0.322	4.373
14.8288	0.329	0.322	0.336	4.367			13.7798	0.331	0.338	0.317	4.367
14.8489	0.327	0.321	0.333	4.361			13.8001	0.328	0.335	0.313	4.361
14.869	0.324	0.319	0.328	4.355			13.8203	0.327	0.334	0.31	4.355
14.8891	0.322	0.319	0.324	4.35			13.8406	0.324	0.332	0.308	4.35
14.9091	0.319	0.316	0.322	4.344			13.8608	0.321	0.33	0.304	4.344
14.9292	0.318	0.318	0.319	4.338			13.8811	0.32	0.329	0.302	4.338
14.9492	0.316	0.316	0.315	4.332			13.9014	0.318	0.328	0.299	4.332
14.9693	0.314	0.314	0.312	4.326			13.9216	0.316	0.326	0.298	4.326
14.9893	0.311	0.312	0.308	4.321			13.9418	0.314	0.325	0.296	4.321
15.0094	0.31	0.312	0.305	4.315			13.9621	0.313	0.324	0.294	4.315
15.0294	0.309	0.311	0.304	4.309			13.9823	0.312	0.323	0.293	4.309
15.0495	0.307	0.313	0.3	4.304			14.0025	0.311	0.321	0.293	4.304
15.0695	0.306	0.31	0.299	4.298			14.0228	0.309	0.321	0.29	4.298
15.0895	0.303	0.309	0.295	4.292			14.043	0.307	0.317	0.289	4.292
15.1096	0.302	0.309	0.293	4.287			14.0632	0.306	0.316	0.288	4.287
15.1296	0.301	0.308	0.291	4.281			14.0834	0.306	0.317	0.288	4.281
15.1496	0.3	0.308	0.29	4.275			14.1036	0.305	0.316	0.286	4.275
15.1696	0.298	0.306	0.287	4.27			14.1238	0.304	0.315	0.285	4.27
15.1897	0.298	0.306	0.286	4.264			14.144	0.302	0.313	0.284	4.264
15.2097	0.297	0.304	0.285	4.258			14.1642	0.301	0.312	0.282	4.258
15.2297	0.296	0.304	0.284	4.253			14.1844	0.302	0.314	0.282	4.253
15.2497	0.295	0.303	0.283	4.247			14.2046	0.301	0.312	0.281	4.247
15.2697	0.295	0.302	0.283	4.242			14.2248	0.299	0.31	0.279	4.242
15.2897	0.293	0.3	0.281	4.236			14.245	0.298	0.309	0.28	4.236
15.3096	0.293	0.302	0.279	4.231			14.2652	0.297	0.31	0.278	4.231
15.3296	0.292	0.3	0.279	4.225			14.2854	0.297	0.309	0.278	4.225
15.3496	0.29	0.299	0.277	4.22			14.3056	0.296	0.307	0.277	4.22
15.3696	0.29	0.3	0.276	4.214			14.3257	0.295	0.307	0.274	4.214
15.3896	0.289	0.298	0.277	4.209			14.3459	0.294	0.305	0.274	4.209
15.4095	0.289	0.297	0.275	4.204			14.3661	0.293	0.305	0.274	4.204
15.4295	0.287	0.295	0.274	4.198			14.3862	0.293	0.305	0.273	4.198
15.4495	0.287	0.296	0.272	4.193			14.4064	0.292	0.304	0.271	4.193
15.4694	0.286	0.296	0.272	4.187			14.4265	0.292	0.304	0.272	4.187
15.4894	0.286	0.294	0.272	4.182			14.4467	0.29	0.304	0.269	4.182
15.5093	0.285	0.295	0.268	4.177			14.4668	0.289	0.302	0.268	4.177
15.5293	0.284	0.294	0.269	4.171			14.487	0.29	0.301	0.269	4.171
15.5492	0.283	0.294	0.267	4.166			14.5071	0.289	0.302	0.269	4.166
15.5692	0.282	0.292	0.265	4.161			14.5273	0.288	0.3	0.267	4.161
15.5891	0.282	0.292	0.266	4.155			14.5474	0.288	0.3	0.267	4.155
15.609	0.28	0.29	0.263	4.15			14.5675	0.288	0.301	0.267	4.15
15.629	0.28	0.291	0.262	4.145			14.5876	0.286	0.298	0.266	4.145
15.6489	0.28	0.29	0.262	4.14			14.6077	0.286	0.299	0.265	4.14
15.6688	0.279	0.29	0.261	4.134			14.6279	0.286	0.298	0.265	4.134
15.6887	0.277	0.288	0.26	4.129			14.648	0.286	0.299	0.266	4.129
15.7086	0.277	0.288	0.26	4.124			14.6681	0.285	0.298	0.263	4.124
15.7286	0.276	0.287	0.258	4.119			14.6882	0.285	0.297	0.264	4.119
15.7485	0.275	0.285	0.258	4.114			14.7083	0.284	0.296	0.263	4.114
15.7683	0.275	0.287	0.257	4.108			14.7284	0.284	0.296	0.264	4.108
15.7882	0.275	0.286	0.255	4.103			14.7485	0.284	0.296	0.263	4.103
15.8081	0.273	0.285	0.255	4.098			14.7686	0.284	0.296	0.263	4.098
15.828	0.273	0.284	0.255	4.093			14.7887	0.283	0.295	0.263	4.093
15.8479	0.273	0.285	0.253	4.088			14.8088	0.283	0.295	0.263	4.088
15.8678	0.273	0.283	0.255	4.083			14.8288	0.283	0.296	0.262	4.083
15.8877	0.272	0.283	0.254	4.078			14.8489	0.282	0.294	0.262	4.078
15.9076	0.272	0.282	0.254	4.073			14.869	0.282	0.295	0.261	4.073
15.9274	0.272	0.283	0.252	4.068			14.8891	0.282	0.294	0.262	4.068
15.9473	0.272	0.282	0.253	4.063			14.9091	0.283	0.294	0.263	4.063
15.9672	0.272	0.282	0.253	4.058			14.9292	0.282	0.294	0.262	4.058
15.987	0.272	0.282	0.253	4.053			14.9492	0.283	0.294	0.262	4.053
16.0069	0.271	0.281	0.252	4.048			14.9693	0.282	0.294	0.262	4.048
16.0267	0.272	0.282	0.254	4.043			14.9893	0.282	0.293	0.262	4.043
16.0466	0.272	0.28	0.255	4.038			15.0094	0.282	0.294	0.261	4.038
16.0664	0.271	0.281	0.253	4.033			15.0294	0.282	0.293	0.261	4.033
16.0862	0.272	0.279	0.255	4.028			15.0495	0.281	0.292	0.262	4.028
16.1061	0.272	0.28	0.254	4.023			15.0695	0.282	0.293	0.261	4.023
16.1259	0.272	0.28	0.254	4.018			15.0895	0.282	0.294	0.261	4.018
16.1457	0.273	0.281	0.256	4.013			15.1096	0.281	0.293	0.26	4.013
16.1655	0.271	0.279	0.255	4.008			15.1296	0.281	0.292	0.26	4.008
16.1854	0.273	0.279	0.256	4.003			15.1496	0.28	0.292	0.26	4.003
16.2052	0.273	0.279	0.256	3.998			15.1696	0.28	0.293	0.259	3.998
16.225	0.273	0.279	0.257	3.994			15.1897	0.28	0.292	0.26	3.994
16.2448	0.273	0.278	0.259	3.989			15.2097	0.279	0.29	0.26	3.989
16.2646	0.274	0.279	0.259	3.984			15.2297	0.28	0.291	0.259	3.984
16.2844	0.273	0.279	0.258	3.979			15.2497	0.279	0.291	0.259	3.979
16.3042	0.274	0.279	0.258	3.974			15.2697	0.279	0.292	0.259	3.974
16.324	0.274	0.279	0.258	3.97			15.2897	0.279	0.291	0.258	3.97
16.3438	0.275	0.28	0.259	3.965			15.3096	0.278	0.29	0.258	3.965
16.3636	0.274	0.279	0.259	3.96			15.3296	0.279	0.29	0.259	3.96
16.3833	0.274	0.278	0.259	3.955			15.3496	0.279	0.29	0.259	3.955
16.4031	0.275	0.279	0.261	3.951			15.3696	0.278	0.29	0.257	3.951
16.4229	0.274	0.278	0.259	3.946			15.3896	0.277	0.29	0.257	3.946
16.4427	0.275	0.278	0.26	3.941			15.4095	0.277	0.289	0.257	3.941
16.4624	0.275	0.277	0.26	3.936			15.4295	0.278	0.29	0.258	3.936
16.4822	0.274	0.277	0.259	3.932			15.4495	0.277	0.289	0.256	3.932
16.5019	0.275	0.277	0.26	3.927			15.4694	0.277	0.289	0.257	3.927
16.5217	0.274	0.277	0.26	3.922			15.4894	0.277	0.288	0.258	3.922
16.5414	0.275	0.278	0.26	3.918			15.5093	0.276	0.288	0.256	3.918
16.5612	0.274	0.278	0.259	3.913			15.5293	0.277	0.288	0.257	3.913
16.5809	0.275	0.277	0.26	3.908			15.5492	0.276	0.287	0.256	3.908
16.6006	0.274	0.277	0.259	3.904			15.5692	0.277	0.288	0.257	3.904
16.6204	0.274	0.276	0.259	3.899			15.5891	0.277	0.287	0.257	3.899
16.6401	0.274	0.276	0.26	3.895			15.609	0.276	0.288	0.256	3.895
16.6598	0.274	0.277	0.258	3.89			15.629	0.277	0.289	0.257	3.89
16.6795	0.274	0.276	0.26	3.886			15.6489	0.277	0.289	0.257	3.886
16.6992	0.274	0.276	0.259	3.881			15.6688	0.277	0.288	0.258	3.881
16.7189	0.274	0.275	0.26	3.876			15.6887	0.277	0.288	0.258	3.876
16.7387	0.274	0.276	0.259	3.872			15.7086	0.277	0.288	0.257	3.872
16.7584	0.273	0.276	0.258	3.867			15.7286	0.277	0.287	0.258	3.867
16.7781	0.273	0.275	0.258	3.863			15.7485	0.277	0.288	0.258	3.863
16.7978	0.273	0.276	0.257	3.858			15.7683	0.278	0.289	0.259	3.858
16.8174	0.273	0.275	0.257	3.854			15.7882	0.278	0.288	0.259	3.854
16.8371	0.273	0.276	0.257	3.849			15.8081	0.278	0.289	0.259	3.849
16.8568	0.271	0.274	0.255	3.845			15.828	0.279	0.289	0.261	3.845
16.8765	0.273	0.276	0.256	3.84			15.8479	0.279	0.288	0.262	3.84
16.8962	0.272	0.275	0.255	3.836			15.8678	0.28	0.289	0.261	3.836
16.9158	0.271	0.273	0.255	3.832			15.8877	0.28	0.289	0.261	3.832
16.9355	0.271	0.274	0.255	3.827			15.9076	0.281	0.289	0.262	3.827
16.9551	0.271	0.274	0.253	3.823			15.9274	0.281	0.289	0.262	3.823
16.9748	0.271	0.275	0.253	3.818			15.9473	0.281	0.289	0.263	3.818
16.9945	0.27	0.273	0.253	3.814			15.9672	0.282	0.29	0.264	3.814
17.0141	0.271	0.274	0.253	3.81			15.987	0.282	0.29	0.264	3.81
17.0338	0.27	0.274	0.253	3.805			16.0069	0.282	0.29	0.265	3.805
17.0534	0.27	0.273	0.252	3.801			16.0267	0.283	0.292	0.265	3.801
17.073	0.269	0.271	0.252	3.797			16.0466	0.284	0.291	0.266	3.797
17.0927	0.27	0.272	0.252	3.792			16.0664	0.283	0.29	0.266	3.792
17.1123	0.27	0.273	0.253	3.788			16.0862	0.283	0.291	0.267	3.788
17.1319	0.268	0.271	0.251	3.784			16.1061	0.284	0.292	0.266	3.784
17.1515	0.269	0.271	0.251	3.779			16.1259	0.284	0.291	0.267	3.779
17.1712	0.269	0.272	0.251	3.775			16.1457	0.284	0.29	0.268	3.775
17.1908	0.269	0.272	0.25	3.771			16.1655	0.284	0.29	0.268	3.771
17.2104	0.268	0.271	0.25	3.767			16.1854	0.284	0.291	0.268	3.767
17.23	0.268	0.271	0.249	3.762			16.2052	0.284	0.29	0.268	3.762
17.2496	0.268	0.27	0.25	3.758			16.225	0.285	0.291	0.268	3.758
17.2692	0.267	0.27	0.249	3.754			16.2448	0.284	0.291	0.266	3.754
17.2888	0.268	0.27	0.249	3.75			16.2646	0.283	0.292	0.266	3.75
17.3083	0.267	0.27	0.248	3.745			16.2844	0.284	0.292	0.266	3.745
17.3279	0.267	0.27	0.248	3.741			16.3042	0.283	0.29	0.266	3.741
17.3475	0.267	0.269	0.248	3.737			16.324	0.283	0.29	0.265	3.737
17.3671	0.265	0.269	0.246	3.733			16.3438	0.282	0.29	0.265	3.733
17.3866	0.266	0.269	0.246	3.729			16.3636	0.282	0.29	0.264	3.729
17.4062	0.265	0.268	0.247	3.724			16.3833	0.281	0.289	0.263	3.724
17.4258	0.265	0.268	0.246	3.72			16.4031	0.281	0.289	0.262	3.72
17.4453	0.264	0.267	0.245	3.716			16.4229	0.28	0.289	0.261	3.716
17.4649	0.264	0.268	0.246	3.712			16.4427	0.279	0.288	0.259	3.712
17.4844	0.264	0.268	0.244	3.708			16.4624	0.278	0.287	0.258	3.708
17.504	0.264	0.269	0.242	3.704			16.4822	0.277	0.286	0.258	3.704
17.5235	0.263	0.267	0.243	3.7			16.5019	0.277	0.286	0.258	3.7
17.5431	0.262	0.267	0.242	3.696			16.5217	0.276	0.285	0.256	3.696
17.5626	0.262	0.266	0.241	3.692			16.5414	0.275	0.285	0.254	3.692
17.5821	0.261	0.265	0.242	3.687			16.5612	0.274	0.284	0.252	3.687
17.6016	0.261	0.266	0.241	3.683			16.5809	0.272	0.283	0.252	3.683
17.6212	0.26	0.265	0.24	3.679			16.6006	0.271	0.281	0.25	3.679
17.6407	0.26	0.264	0.239	3.675			16.6204	0.27	0.28	0.25	3.675
17.6602	0.259	0.265	0.238	3.671			16.6401	0.269	0.28	0.248	3.671
17.6797	0.257	0.263	0.236	3.667			16.6598	0.268	0.28	0.247	3.667
17.6992	0.258	0.263	0.235	3.663			16.6795	0.267	0.279	0.246	3.663
17.7187	0.257	0.263	0.235	3.659			16.6992	0.266	0.279	0.244	3.659
17.7382	0.256	0.262	0.235	3.655			16.7189	0.265	0.277	0.244	3.655
17.7577	0.255	0.262	0.232	3.651			16.7387	0.264	0.276	0.242	3.651
17.7771	0.255	0.262	0.232	3.647			16.7584	0.263	0.276	0.24	3.647
17.7966	0.254	0.261	0.231	3.643			16.7781	0.261	0.274	0.239	3.643
17.8161	0.253	0.26	0.231	3.639			16.7978	0.261	0.274	0.238	3.639
17.8356	0.252	0.259	0.23	3.636			16.8174	0.259	0.273	0.236	3.636
17.855	0.252	0.259	0.23	3.632			16.8371	0.258	0.272	0.235	3.632
17.8745	0.252	0.26	0.228	3.628			16.8568	0.257	0.271	0.234	3.628
17.894	0.25	0.26	0.226	3.624			16.8765	0.256	0.27	0.233	3.624
17.9134	0.249	0.257	0.225	3.62			16.8962	0.255	0.27	0.23	3.62
17.9329	0.249	0.258	0.226	3.616			16.9158	0.255	0.269	0.232	3.616
17.9523	0.248	0.257	0.224	3.612			16.9355	0.254	0.269	0.229	3.612
17.9718	0.248	0.257	0.225	3.608			16.9551	0.252	0.268	0.228	3.608
17.9912	0.247	0.257	0.223	3.604			16.9748	0.251	0.266	0.227	3.604
18.0106	0.246	0.256	0.222	3.6			16.9945	0.25	0.266	0.226	3.6
18.0301	0.245	0.255	0.22	3.597			17.0141	0.249	0.264	0.225	3.597
18.0495	0.245	0.256	0.22	3.593			17.0338	0.248	0.264	0.225	3.593
18.0689	0.245	0.254	0.221	3.589			17.0534	0.247	0.264	0.223	3.589
18.0883	0.244	0.255	0.22	3.585			17.073	0.246	0.262	0.222	3.585
18.1077	0.244	0.255	0.219	3.581			17.0927	0.246	0.262	0.22	3.581
18.1272	0.242	0.252	0.218	3.578			17.1123	0.245	0.261	0.22	3.578
18.1466	0.242	0.253	0.217	3.574			17.1319	0.244	0.26	0.22	3.574
18.166	0.241	0.252	0.215	3.57			17.1515	0.243	0.26	0.219	3.57
18.1853	0.24	0.251	0.215	3.566			17.1712	0.242	0.258	0.217	3.566
18.2047	0.24	0.252	0.215	3.562			17.1908	0.241	0.257	0.216	3.562
18.2241	0.24	0.252	0.214	3.559			17.2104	0.241	0.257	0.216	3.559
18.2435	0.239	0.252	0.213	3.555			17.23	0.24	0.256	0.216	3.555
18.2629	0.238	0.25	0.213	3.551			17.2496	0.239	0.256	0.214	3.551
18.2823	0.238	0.248	0.213	3.547			17.2692	0.239	0.257	0.214	3.547
18.3016	0.237	0.248	0.212	3.544			17.2888	0.238	0.255	0.213	3.544
18.321	0.237	0.249	0.211	3.54			17.3083	0.237	0.253	0.213	3.54
18.3404	0.237	0.248	0.212	3.536			17.3279	0.237	0.254	0.212	3.536
18.3597	0.236	0.249	0.21	3.533			17.3475	0.236	0.252	0.21	3.533
18.3791	0.235	0.247	0.209	3.529			17.3671	0.236	0.252	0.211	3.529
18.3984	0.235	0.246	0.209	3.525			17.3866	0.235	0.251	0.21	3.525
18.4178	0.234	0.246	0.209	3.522			17.4062	0.234	0.25	0.209	3.522
18.4371	0.234	0.246	0.209	3.518			17.4258	0.233	0.25	0.208	3.518
18.4564	0.233	0.245	0.208	3.514			17.4453	0.233	0.251	0.207	3.514
18.4758	0.233	0.245	0.207	3.511			17.4649	0.232	0.248	0.208	3.511
18.4951	0.232	0.245	0.206	3.507			17.4844	0.232	0.25	0.207	3.507
18.5144	0.231	0.244	0.206	3.503			17.504	0.231	0.248	0.205	3.503
18.5337	0.231	0.244	0.205	3.5			17.5235	0.23	0.246	0.205	3.5
18.553	0.231	0.244	0.205	3.496			17.5431	0.229	0.246	0.205	3.496
18.5724	0.23	0.243	0.204	3.492			17.5626	0.229	0.246	0.206	3.492
18.5917	0.23	0.242	0.204	3.489			17.5821	0.229	0.246	0.203	3.489
18.6109	0.229	0.243	0.204	3.485			17.6016	0.228	0.246	0.203	3.485
18.6303	0.228	0.242	0.202	3.482			17.6212	0.228	0.245	0.203	3.482
18.6495	0.228	0.242	0.201	3.478			17.6407	0.227	0.245	0.202	3.478
18.6688	0.227	0.24	0.201	3.475			17.6602	0.227	0.243	0.201	3.475
18.6881	0.227	0.241	0.201	3.471			17.6797	0.226	0.243	0.201	3.471
18.7074	0.227	0.24	0.2	3.467			17.6992	0.225	0.242	0.2	3.467
18.7267	0.226	0.239	0.201	3.464			17.7187	0.224	0.241	0.199	3.464
18.7459	0.226	0.24	0.2	3.46			17.7382	0.224	0.243	0.199	3.46
18.7652	0.225	0.239	0.199	3.457			17.7577	0.223	0.241	0.198	3.457
18.7844	0.224	0.239	0.198	3.453			17.7771	0.223	0.24	0.198	3.453
18.8037	0.223	0.237	0.197	3.45			17.7966	0.222	0.239	0.198	3.45
18.823	0.224	0.238	0.197	3.446			17.8161	0.222	0.24	0.197	3.446
18.8422	0.223	0.237	0.197	3.443			17.8356	0.221	0.238	0.196	3.443
18.8615	0.222	0.237	0.196	3.439			17.855	0.221	0.239	0.196	3.439
18.8807	0.221	0.235	0.195	3.436			17.8745	0.22	0.238	0.194	3.436
18.8999	0.221	0.236	0.194	3.432			17.894	0.219	0.238	0.194	3.432
18.9191	0.221	0.236	0.193	3.429			17.9134	0.219	0.237	0.193	3.429
18.9384	0.22	0.235	0.193	3.426			17.9329	0.219	0.237	0.193	3.426
18.9576	0.22	0.235	0.193	3.422			17.9523	0.218	0.236	0.193	3.422
18.9768	0.219	0.235	0.191	3.419			17.9718	0.218	0.236	0.192	3.419
18.996	0.218	0.234	0.191	3.415			17.9912	0.217	0.235	0.19	3.415
19.0152	0.218	0.234	0.19	3.412			18.0106	0.216	0.234	0.19	3.412
19.0344	0.217	0.233	0.19	3.408			18.0301	0.216	0.236	0.19	3.408
19.0536	0.217	0.233	0.189	3.405			18.0495	0.215	0.233	0.189	3.405
19.0728	0.216	0.233	0.189	3.402			18.0689	0.215	0.234	0.188	3.402
19.092	0.215	0.231	0.188	3.398			18.0883	0.214	0.233	0.189	3.398
19.1112	0.214	0.23	0.188	3.395			18.1077	0.214	0.232	0.188	3.395
19.1304	0.214	0.231	0.187	3.392			18.1272	0.213	0.231	0.187	3.392
19.1496	0.214	0.231	0.186	3.388			18.1466	0.213	0.232	0.186	3.388
19.1687	0.214	0.231	0.186	3.385			18.166	0.212	0.232	0.186	3.385
19.1879	0.212	0.229	0.184	3.381			18.1853	0.211	0.23	0.185	3.381
19.2071	0.212	0.229	0.185	3.378			18.2047	0.211	0.23	0.185	3.378
19.2262	0.211	0.228	0.185	3.375			18.2241	0.21	0.23	0.184	3.375
19.2454	0.211	0.228	0.183	3.371			18.2435	0.21	0.229	0.184	3.371
19.2645	0.211	0.229	0.182	3.368			18.2629	0.21	0.229	0.183	3.368
19.2837	0.21	0.228	0.182	3.365			18.2823	0.209	0.229	0.182	3.365
19.3028	0.209	0.227	0.182	3.361			18.3016	0.208	0.227	0.182	3.361
19.3219	0.209	0.228	0.182	3.358			18.321	0.207	0.227	0.181	3.358
19.3411	0.208	0.226	0.181	3.355			18.3404	0.207	0.226	0.181	3.355
19.3602	0.207	0.226	0.179	3.352			18.3597	0.207	0.226	0.181	3.352
19.3793	0.207	0.226	0.179	3.348			18.3791	0.206	0.227	0.18	3.348
19.3984	0.207	0.226	0.179	3.345			18.3984	0.206	0.225	0.181	3.345
19.4175	0.206	0.225	0.179	3.342			18.4178	0.206	0.225	0.18	3.342
19.4367	0.207	0.226	0.179	3.339			18.4371	0.205	0.224	0.179	3.339
19.4558	0.206	0.225	0.178	3.335			18.4564	0.204	0.224	0.178	3.335
19.4749	0.206	0.225	0.178	3.332			18.4758	0.204	0.223	0.178	3.332
19.494	0.205	0.223	0.177	3.329			18.4951	0.203	0.223	0.177	3.329
19.513	0.204	0.223	0.177	3.326			18.5144	0.203	0.223	0.176	3.326
19.5321	0.205	0.223	0.176	3.322			18.5337	0.203	0.223	0.177	3.322
19.5512	0.204	0.224	0.175	3.319			18.553	0.202	0.221	0.176	3.319
19.5703	0.204	0.223	0.175	3.316			18.5724	0.201	0.221	0.174	3.316
19.5894	0.203	0.222	0.175	3.313			18.5917	0.201	0.222	0.174	3.313
19.6084	0.203	0.222	0.174	3.31			18.6109	0.2	0.221	0.174	3.31
19.6275	0.202	0.223	0.174	3.306			18.6303	0.199	0.22	0.173	3.306
19.6466	0.202	0.222	0.173	3.303			18.6495	0.199	0.22	0.172	3.303
19.6656	0.201	0.221	0.173	3.3			18.6688	0.198	0.219	0.172	3.3
19.6847	0.201	0.221	0.173	3.297			18.6881	0.199	0.219	0.172	3.297
19.7037	0.201	0.221	0.172	3.294			18.7074	0.198	0.219	0.171	3.294
19.7228	0.2	0.22	0.172	3.291			18.7267	0.197	0.218	0.17	3.291
19.7418	0.201	0.221	0.172	3.287			18.7459	0.197	0.218	0.17	3.287
19.7608	0.2	0.22	0.171	3.284			18.7652	0.196	0.215	0.17	3.284
19.7798	0.2	0.22	0.172	3.281			18.7844	0.196	0.217	0.17	3.281
19.7989	0.2	0.22	0.172	3.278			18.8037	0.195	0.216	0.169	3.278
19.8179	0.2	0.219	0.172	3.275			18.823	0.195	0.215	0.169	3.275
19.8369	0.199	0.219	0.17	3.272			18.8422	0.195	0.215	0.168	3.272
19.8559	0.198	0.218	0.17	3.269			18.8615	0.194	0.214	0.168	3.269
19.8749	0.199	0.219	0.171	3.266			18.8807	0.194	0.214	0.167	3.266
19.8939	0.198	0.219	0.169	3.263			18.8999	0.193	0.213	0.167	3.263
19.9129	0.197	0.218	0.169	3.259			18.9191	0.192	0.213	0.166	3.259
19.9319	0.197	0.218	0.169	3.256			18.9384	0.192	0.214	0.165	3.256
19.9509	0.197	0.217	0.168	3.253			18.9576	0.192	0.212	0.165	3.253
19.9699	0.197	0.217	0.169	3.25			18.9768	0.192	0.213	0.165	3.25
19.9889	0.196	0.217	0.168	3.247			18.996	0.191	0.211	0.165	3.247
20.0078	0.196	0.217	0.167	3.244			19.0152	0.19	0.21	0.164	3.244
20.0268	0.196	0.216	0.167	3.241			19.0344	0.19	0.211	0.164	3.241
20.0458	0.196	0.216	0.167	3.238			19.0536	0.189	0.21	0.163	3.238
20.0647	0.196	0.217	0.167	3.235			19.0728	0.189	0.21	0.163	3.235
20.0837	0.195	0.216	0.166	3.232			19.092	0.188	0.209	0.162	3.232
20.1026	0.195	0.216	0.166	3.229			19.1112	0.188	0.209	0.161	3.229
20.1216	0.194	0.216	0.165	3.226			19.1304	0.188	0.208	0.162	3.226
20.1405	0.194	0.216	0.166	3.223			19.1496	0.188	0.209	0.161	3.223
20.1594	0.194	0.215	0.166	3.22			19.1687	0.187	0.207	0.161	3.22
20.1784	0.194	0.216	0.166	3.217			19.1879	0.188	0.208	0.162	3.217
20.1973	0.194	0.215	0.165	3.214			19.2071	0.186	0.206	0.16	3.214
20.2162	0.192	0.214	0.164	3.211			19.2262	0.186	0.206	0.16	3.211
20.2352	0.193	0.214	0.163	3.208			19.2454	0.186	0.206	0.16	3.208
20.2541	0.192	0.213	0.163	3.205			19.2645	0.185	0.207	0.159	3.205
20.273	0.192	0.214	0.163	3.202			19.2837	0.185	0.206	0.158	3.202
20.2919	0.192	0.215	0.163	3.199			19.3028	0.184	0.205	0.159	3.199
20.3108	0.192	0.213	0.163	3.196			19.3219	0.184	0.205	0.158	3.196
20.3297	0.192	0.213	0.163	3.193			19.3411	0.184	0.205	0.158	3.193
20.3486	0.191	0.214	0.162	3.19			19.3602	0.183	0.204	0.157	3.19
20.3674	0.191	0.213	0.162	3.187			19.3793	0.183	0.203	0.158	3.187
20.3863	0.191	0.213	0.161	3.185			19.3984	0.183	0.203	0.157	3.185
20.4052	0.191	0.213	0.162	3.182			19.4175	0.183	0.205	0.157	3.182
20.4241	0.19	0.212	0.161	3.179			19.4367	0.182	0.203	0.156	3.179
20.4429	0.19	0.212	0.161	3.176			19.4558	0.182	0.204	0.155	3.176
20.4618	0.19	0.213	0.16	3.173			19.4749	0.182	0.202	0.156	3.173
20.4807	0.189	0.212	0.161	3.17			19.494	0.181	0.202	0.155	3.17
20.4995	0.189	0.212	0.16	3.167			19.513	0.181	0.202	0.155	3.167
20.5184	0.189	0.212	0.159	3.164			19.5321	0.181	0.202	0.154	3.164
20.5372	0.189	0.212	0.16	3.161			19.5512	0.181	0.201	0.155	3.161
20.556	0.189	0.211	0.159	3.159			19.5703	0.181	0.202	0.155	3.159
20.5749	0.188	0.211	0.159	3.156			19.5894	0.18	0.2	0.154	3.156
20.5937	0.188	0.211	0.159	3.153			19.6084	0.179	0.201	0.153	3.153
20.6125	0.187	0.21	0.158	3.15			19.6275	0.18	0.2	0.154	3.15
20.6314	0.188	0.211	0.159	3.147			19.6466	0.179	0.201	0.153	3.147
20.6502	0.187	0.21	0.158	3.144			19.6656	0.179	0.2	0.152	3.144
20.669	0.186	0.21	0.158	3.141			19.6847	0.179	0.201	0.152	3.141
20.6878	0.186	0.209	0.157	3.139			19.7037	0.179	0.2	0.153	3.139
20.7066	0.187	0.21	0.157	3.136			19.7228	0.178	0.2	0.152	3.136
20.7254	0.186	0.209	0.157	3.133			19.7418	0.178	0.199	0.152	3.133
20.7442	0.186	0.209	0.156	3.13			19.7608	0.178	0.199	0.152	3.13
20.763	0.186	0.209	0.156	3.127			19.7798	0.178	0.2	0.151	3.127
20.7817	0.185	0.209	0.155	3.125			19.7989	0.178	0.199	0.152	3.125
20.8005	0.185	0.208	0.155	3.122			19.8179	0.177	0.199	0.151	3.122
20.8193	0.185	0.209	0.155	3.119			19.8369	0.177	0.198	0.151	3.119
20.8381	0.184	0.208	0.155	3.116			19.8559	0.176	0.198	0.151	3.116
20.8568	0.183	0.207	0.154	3.113			19.8749	0.176	0.198	0.15	3.113
20.8756	0.184	0.208	0.154	3.111			19.8939	0.176	0.198	0.15	3.111
20.8944	0.184	0.206	0.155	3.108			19.9129	0.176	0.199	0.15	3.108
20.9131	0.183	0.207	0.154	3.105			19.9319	0.175	0.196	0.15	3.105
20.9319	0.183	0.207	0.153	3.102			19.9509	0.175	0.197	0.148	3.102
20.9506	0.182	0.206	0.153	3.1			19.9699	0.175	0.197	0.149	3.1
20.9693	0.182	0.207	0.152	3.097			19.9889	0.175	0.196	0.149	3.097
20.9881	0.182	0.205	0.152	3.094			20.0078	0.175	0.197	0.149	3.094
21.0068	0.181	0.206	0.152	3.092			20.0268	0.175	0.197	0.148	3.092
21.0255	0.182	0.205	0.153	3.089			20.0458	0.175	0.197	0.147	3.089
21.0442	0.181	0.204	0.152	3.086			20.0647	0.174	0.196	0.148	3.086
21.0629	0.181	0.205	0.151	3.083			20.0837	0.174	0.196	0.147	3.083
21.0816	0.181	0.205	0.152	3.081			20.1026	0.174	0.196	0.147	3.081
21.1003	0.18	0.205	0.151	3.078			20.1216	0.173	0.195	0.146	3.078
21.1191	0.18	0.204	0.151	3.075			20.1405	0.173	0.195	0.146	3.075
21.1378	0.18	0.204	0.151	3.073			20.1594	0.173	0.195	0.146	3.073
21.1564	0.179	0.203	0.151	3.07			20.1784	0.172	0.194	0.146	3.07
21.1751	0.18	0.204	0.15	3.067			20.1973	0.172	0.193	0.146	3.067
21.1938	0.179	0.202	0.15	3.065			20.2162	0.172	0.194	0.146	3.065
21.2125	0.179	0.203	0.15	3.062			20.2352	0.171	0.193	0.145	3.062
21.2311	0.178	0.203	0.149	3.059			20.2541	0.171	0.192	0.146	3.059
21.2498	0.178	0.202	0.149	3.057			20.273	0.171	0.193	0.145	3.057
21.2685	0.178	0.202	0.15	3.054			20.2919	0.17	0.191	0.144	3.054
21.2871	0.177	0.202	0.148	3.051			20.3108	0.17	0.192	0.144	3.051
21.3058	0.177	0.201	0.149	3.049			20.3297	0.17	0.192	0.144	3.049
21.3244	0.177	0.201	0.149	3.046			20.3486	0.17	0.191	0.144	3.046
21.3431	0.177	0.201	0.148	3.043			20.3674	0.169	0.191	0.143	3.043
21.3617	0.177	0.201	0.148	3.041			20.3863	0.169	0.191	0.143	3.041
21.3803	0.177	0.201	0.147	3.038			20.4052	0.169	0.19	0.143	3.038
21.399	0.176	0.2	0.147	3.036			20.4241	0.169	0.191	0.142	3.036
21.4176	0.175	0.2	0.147	3.033			20.4429	0.168	0.19	0.143	3.033
21.4362	0.176	0.2	0.147	3.03			20.4618	0.169	0.191	0.143	3.03
21.4548	0.175	0.2	0.146	3.028			20.4807	0.168	0.19	0.143	3.028
21.4734	0.175	0.199	0.146	3.025			20.4995	0.168	0.191	0.142	3.025
21.492	0.175	0.199	0.146	3.023			20.5184	0.167	0.189	0.142	3.023
21.5106	0.174	0.197	0.146	3.02			20.5372	0.167	0.188	0.141	3.02
21.5292	0.174	0.198	0.146	3.017			20.556	0.167	0.188	0.141	3.017
21.5478	0.173	0.197	0.145	3.015			20.5749	0.167	0.189	0.141	3.015
21.5664	0.173	0.197	0.145	3.012			20.5937	0.167	0.189	0.14	3.012
21.585	0.173	0.197	0.145	3.01			20.6125	0.166	0.187	0.14	3.01
21.6036	0.172	0.196	0.144	3.007			20.6314	0.166	0.188	0.14	3.007
21.6221	0.173	0.197	0.145	3.005			20.6502	0.165	0.188	0.14	3.005
21.6407	0.172	0.197	0.144	3.002			20.669	0.165	0.187	0.139	3.002
21.6593	0.172	0.196	0.144	2.999			20.6878	0.165	0.187	0.139	2.999
21.6778	0.171	0.196	0.143	2.997			20.7066	0.165	0.187	0.139	2.997
21.6964	0.172	0.196	0.143	2.994			20.7254	0.165	0.186	0.139	2.994
21.7149	0.171	0.196	0.142	2.992			20.7442	0.164	0.186	0.138	2.992
21.7335	0.171	0.195	0.143	2.989			20.763	0.163	0.185	0.138	2.989
21.752	0.171	0.195	0.143	2.987			20.7817	0.164	0.185	0.138	2.987
21.7705	0.171	0.196	0.143	2.984			20.8005	0.163	0.185	0.138	2.984
21.7891	0.17	0.194	0.142	2.982			20.8193	0.163	0.184	0.137	2.982
21.8076	0.17	0.194	0.142	2.979			20.8381	0.163	0.184	0.137	2.979
21.8261	0.17	0.193	0.142	2.977			20.8568	0.162	0.184	0.137	2.977
21.8446	0.169	0.193	0.141	2.974			20.8756	0.162	0.183	0.136	2.974
21.8631	0.169	0.194	0.141	2.972			20.8944	0.161	0.182	0.137	2.972
21.8816	0.169	0.193	0.14	2.969			20.9131	0.161	0.183	0.136	2.969
21.9001	0.168	0.193	0.139	2.967			20.9319	0.161	0.182	0.136	2.967
21.9186	0.168	0.192	0.14	2.964			20.9506	0.16	0.181	0.136	2.964
21.9371	0.169	0.193	0.141	2.962			20.9693	0.16	0.181	0.135	2.962
21.9556	0.168	0.191	0.14	2.959			20.9881	0.16	0.182	0.135	2.959
21.9741	0.168	0.192	0.14	2.957			21.0068	0.16	0.182	0.134	2.957
21.9926	0.167	0.19	0.139	2.955			21.0255	0.16	0.181	0.134	2.955
22.011	0.167	0.191	0.139	2.952			21.0442	0.159	0.18	0.134	2.952
22.0295	0.167	0.191	0.139	2.95			21.0629	0.159	0.18	0.133	2.95
22.048	0.167	0.19	0.139	2.947			21.0816	0.159	0.18	0.133	2.947
22.0664	0.166	0.19	0.138	2.945			21.1003	0.158	0.18	0.132	2.945
22.0848	0.166	0.189	0.138	2.942			21.1191	0.158	0.179	0.133	2.942
22.1033	0.166	0.189	0.139	2.94			21.1378	0.157	0.178	0.132	2.94
22.1217	0.165	0.189	0.138	2.938			21.1564	0.157	0.178	0.132	2.938
22.1402	0.165	0.188	0.137	2.935			21.1751	0.156	0.177	0.132	2.935
22.1586	0.164	0.188	0.137	2.933			21.1938	0.155	0.177	0.132	2.933
22.177	0.163	0.187	0.137	2.93			21.2125	0.155	0.176	0.132	2.93
22.1955	0.163	0.187	0.137	2.928			21.2311	0.155	0.176	0.131	2.928
22.2139	0.162	0.186	0.137	2.925			21.2498	0.154	0.175	0.131	2.925
22.2323	0.162	0.186	0.136	2.923			21.2685	0.154	0.175	0.131	2.923
22.2507	0.162	0.185	0.136	2.921			21.2871	0.154	0.175	0.131	2.921
22.2691	0.161	0.185	0.136	2.918			21.3058	0.153	0.175	0.131	2.918
22.2875	0.16	0.184	0.136	2.916			21.3244	0.153	0.175	0.131	2.916
22.3059	0.16	0.183	0.135	2.914			21.3431	0.153	0.174	0.13	2.914
22.3243	0.16	0.184	0.135	2.911			21.3617	0.152	0.174	0.13	2.911
22.3427	0.159	0.183	0.134	2.909			21.3803	0.152	0.175	0.129	2.909
22.361	0.159	0.182	0.135	2.906			21.399	0.152	0.173	0.13	2.906
22.3794	0.159	0.183	0.134	2.904			21.4176	0.151	0.173	0.129	2.904
22.3978	0.159	0.182	0.134	2.902			21.4362	0.151	0.172	0.13	2.902
22.4161	0.159	0.182	0.135	2.899			21.4548	0.15	0.171	0.128	2.899
22.4345	0.158	0.182	0.133	2.897			21.4734	0.15	0.171	0.128	2.897
22.4529	0.157	0.181	0.132	2.895			21.492	0.15	0.172	0.128	2.895
22.4712	0.157	0.18	0.133	2.892			21.5106	0.15	0.172	0.128	2.892
22.4896	0.157	0.181	0.133	2.89			21.5292	0.149	0.171	0.128	2.89
22.5079	0.156	0.181	0.133	2.888			21.5478	0.149	0.171	0.128	2.888
22.5262	0.156	0.18	0.133	2.885			21.5664	0.148	0.17	0.127	2.885
22.5446	0.156	0.18	0.133	2.883			21.585	0.148	0.17	0.127	2.883
22.5629	0.155	0.179	0.132	2.881			21.6036	0.148	0.17	0.128	2.881
22.5812	0.155	0.179	0.132	2.878			21.6221	0.148	0.169	0.127	2.878
22.5995	0.155	0.179	0.132	2.876			21.6407	0.147	0.17	0.126	2.876
22.6178	0.154	0.178	0.131	2.874			21.6593	0.147	0.169	0.126	2.874
22.6361	0.154	0.179	0.131	2.872			21.6778	0.146	0.168	0.126	2.872
22.6544	0.154	0.178	0.131	2.869			21.6964	0.147	0.168	0.126	2.869
22.6727	0.154	0.177	0.131	2.867			21.7149	0.147	0.168	0.127	2.867
22.691	0.153	0.177	0.132	2.865			21.7335	0.146	0.169	0.126	2.865
22.7093	0.153	0.177	0.131	2.862			21.752	0.146	0.167	0.126	2.862
22.7276	0.152	0.177	0.13	2.86			21.7705	0.146	0.169	0.126	2.86
22.7459	0.152	0.177	0.13	2.858			21.7891	0.145	0.166	0.125	2.858
22.7641	0.152	0.177	0.13	2.856			21.8076	0.145	0.167	0.126	2.856
22.7824	0.152	0.177	0.13	2.853			21.8261	0.145	0.168	0.125	2.853
22.8007	0.152	0.178	0.13	2.851			21.8446	0.146	0.169	0.124	2.851
22.8189	0.152	0.177	0.13	2.849			21.8631	0.146	0.169	0.124	2.849
22.8372	0.152	0.179	0.129	2.847			21.8816	0.146	0.169	0.124	2.847
22.8554	0.153	0.178	0.129	2.844			21.9001	0.146	0.169	0.125	2.844
22.8737	0.153	0.179	0.129	2.842			21.9186	0.147	0.17	0.124	2.842
22.8919	0.153	0.181	0.129	2.84			21.9371	0.146	0.169	0.124	2.84
22.9101	0.153	0.18	0.128	2.838			21.9556	0.146	0.17	0.124	2.838
22.9284	0.153	0.18	0.127	2.835			21.9741	0.146	0.17	0.124	2.835
22.9466	0.153	0.181	0.128	2.833			21.9926	0.146	0.17	0.124	2.833
22.9648	0.153	0.179	0.128	2.831			22.011	0.146	0.17	0.124	2.831
22.983	0.152	0.18	0.128	2.829			22.0295	0.146	0.17	0.124	2.829
23.0012	0.152	0.18	0.127	2.827			22.048	0.146	0.17	0.123	2.827
23.0194	0.153	0.179	0.127	2.824			22.0664	0.146	0.169	0.123	2.824
23.0376	0.152	0.179	0.126	2.822			22.0848	0.146	0.17	0.123	2.822
23.0558	0.152	0.178	0.127	2.82			22.1033	0.146	0.17	0.123	2.82
23.074	0.152	0.179	0.127	2.818			22.1217	0.146	0.169	0.123	2.818
23.0922	0.151	0.179	0.126	2.816			22.1402	0.146	0.17	0.123	2.816
23.1104	0.151	0.178	0.126	2.813			22.1586	0.146	0.169	0.122	2.813
23.1285	0.151	0.178	0.125	2.811			22.177	0.146	0.169	0.123	2.811
23.1467	0.151	0.178	0.126	2.809			22.1955	0.146	0.17	0.122	2.809
23.1649	0.151	0.177	0.125	2.807			22.2139	0.146	0.17	0.123	2.807
23.183	0.151	0.178	0.125	2.805			22.2323	0.146	0.17	0.123	2.805
23.2012	0.15	0.178	0.124	2.803			22.2507	0.146	0.169	0.123	2.803
23.2193	0.15	0.178	0.124	2.8			22.2691	0.145	0.169	0.122	2.8
23.2375	0.15	0.177	0.125	2.798			22.2875	0.145	0.169	0.122	2.798
23.2556	0.15	0.177	0.124	2.796			22.3059	0.145	0.169	0.122	2.796
23.2737	0.15	0.177	0.124	2.794			22.3243	0.145	0.169	0.122	2.794
23.2919	0.149	0.176	0.124	2.792			22.3427	0.145	0.17	0.122	2.792
23.31	0.149	0.176	0.123	2.79			22.361	0.145	0.169	0.121	2.79
23.3281	0.15	0.176	0.124	2.788			22.3794	0.145	0.168	0.121	2.788
23.3462	0.149	0.176	0.124	2.785			22.3978	0.144	0.168	0.121	2.785
23.3644	0.149	0.176	0.123	2.783			22.4161	0.144	0.169	0.121	2.783
23.3824	0.148	0.175	0.122	2.781			22.4345	0.144	0.169	0.12	2.781
23.4005	0.149	0.176	0.123	2.779			22.4529	0.145	0.168	0.121	2.779
23.4186	0.149	0.176	0.123	2.777			22.4712	0.144	0.169	0.12	2.777
23.4367	0.148	0.175	0.122	2.775			22.4896	0.144	0.169	0.12	2.775
23.4548	0.148	0.175	0.121	2.773			22.5079	0.144	0.168	0.12	2.773
23.4729	0.148	0.174	0.122	2.771			22.5262	0.144	0.168	0.121	2.771
23.491	0.148	0.175	0.122	2.768			22.5446	0.144	0.168	0.12	2.768
23.509	0.147	0.175	0.121	2.766			22.5629	0.144	0.168	0.12	2.766
23.5271	0.147	0.174	0.122	2.764			22.5812	0.143	0.167	0.119	2.764
23.5452	0.147	0.173	0.122	2.762			22.5995	0.143	0.167	0.119	2.762
23.5632	0.147	0.174	0.121	2.76			22.6178	0.143	0.168	0.119	2.76
23.5813	0.146	0.172	0.12	2.758			22.6361	0.143	0.167	0.12	2.758
23.5993	0.146	0.174	0.12	2.756			22.6544	0.143	0.168	0.119	2.756
23.6173	0.147	0.174	0.12	2.754			22.6727	0.143	0.167	0.119	2.754
23.6354	0.146	0.173	0.12	2.752			22.691	0.143	0.167	0.119	2.752
23.6534	0.146	0.173	0.12	2.75			22.7093	0.143	0.167	0.119	2.75
23.6714	0.146	0.172	0.12	2.748			22.7276	0.143	0.166	0.119	2.748
23.6895	0.146	0.173	0.119	2.746			22.7459	0.142	0.167	0.118	2.746
23.7075	0.146	0.173	0.12	2.744			22.7641	0.143	0.167	0.118	2.744
23.7255	0.145	0.172	0.119	2.742			22.7824	0.142	0.166	0.118	2.742
23.7435	0.145	0.172	0.119	2.739			22.8007	0.142	0.166	0.119	2.739
23.7615	0.145	0.172	0.12	2.737			22.8189	0.142	0.165	0.118	2.737
23.7795	0.145	0.17	0.119	2.735			22.8372	0.141	0.165	0.117	2.735
23.7975	0.144	0.171	0.118	2.733			22.8554	0.142	0.167	0.117	2.733
23.8155	0.144	0.171	0.118	2.731			22.8737	0.141	0.164	0.117	2.731
23.8334	0.145	0.171	0.118	2.729			22.8919	0.141	0.165	0.117	2.729
23.8514	0.144	0.171	0.118	2.727			22.9101	0.141	0.164	0.117	2.727
23.8694	0.143	0.169	0.118	2.725			22.9284	0.141	0.166	0.116	2.725
23.8874	0.144	0.17	0.118	2.723			22.9466	0.141	0.165	0.117	2.723
23.9053	0.143	0.169	0.118	2.721			22.9648	0.141	0.165	0.116	2.721
23.9233	0.143	0.17	0.117	2.719			22.983	0.14	0.164	0.117	2.719
23.9412	0.143	0.169	0.118	2.717			23.0012	0.14	0.164	0.116	2.717
23.9592	0.143	0.17	0.117	2.715			23.0194	0.14	0.165	0.116	2.715
23.9771	0.143	0.169	0.117	2.713			23.0376	0.14	0.164	0.116	2.713
23.995	0.143	0.169	0.117	2.711			23.0558	0.14	0.165	0.116	2.711
24.013	0.143	0.17	0.117	2.709			23.074	0.139	0.164	0.115	2.709
24.0309	0.143	0.169	0.117	2.707			23.0922	0.14	0.164	0.116	2.707
24.0488	0.143	0.169	0.117	2.705			23.1104	0.139	0.163	0.116	2.705
24.0667	0.142	0.169	0.117	2.703			23.1285	0.139	0.163	0.115	2.703
24.0846	0.142	0.168	0.116	2.701			23.1467	0.139	0.163	0.115	2.701
24.1026	0.142	0.168	0.116	2.699			23.1649	0.139	0.163	0.115	2.699
24.1205	0.142	0.168	0.116	2.697			23.183	0.139	0.163	0.115	2.697
24.1383	0.141	0.167	0.116	2.695			23.2012	0.138	0.162	0.114	2.695
24.1562	0.141	0.167	0.116	2.693			23.2193	0.139	0.163	0.115	2.693
24.1741	0.141	0.167	0.116	2.691			23.2375	0.138	0.162	0.115	2.691
24.192	0.141	0.166	0.115	2.689			23.2556	0.138	0.162	0.115	2.689
24.2099	0.141	0.167	0.115	2.687			23.2737	0.138	0.162	0.114	2.687
24.2278	0.14	0.167	0.114	2.685			23.2919	0.138	0.162	0.114	2.685
24.2456	0.14	0.167	0.115	2.684			23.31	0.138	0.161	0.114	2.684
24.2635	0.14	0.166	0.114	2.682			23.3281	0.137	0.161	0.114	2.682
24.2813	0.14	0.165	0.115	2.68			23.3462	0.137	0.162	0.113	2.68
24.2992	0.14	0.165	0.115	2.678			23.3644	0.137	0.161	0.114	2.678
24.317	0.139	0.165	0.114	2.676			23.3824	0.137	0.161	0.113	2.676
24.3349	0.139	0.165	0.114	2.674			23.4005	0.137	0.161	0.114	2.674
24.3527	0.139	0.165	0.113	2.672			23.4186	0.137	0.16	0.112	2.672
24.3705	0.139	0.165	0.114	2.67			23.4367	0.137	0.161	0.113	2.67
24.3883	0.139	0.165	0.113	2.668			23.4548	0.137	0.161	0.113	2.668
24.4062	0.138	0.164	0.113	2.666			23.4729	0.136	0.16	0.112	2.666
24.424	0.138	0.164	0.113	2.664			23.491	0.137	0.162	0.112	2.664
24.4418	0.138	0.163	0.113	2.662			23.509	0.136	0.161	0.111	2.662
24.4596	0.138	0.163	0.113	2.66			23.5271	0.136	0.16	0.112	2.66
24.4774	0.138	0.164	0.112	2.659			23.5452	0.136	0.16	0.112	2.659
24.4952	0.138	0.164	0.113	2.657			23.5632	0.136	0.161	0.112	2.657
24.513	0.137	0.163	0.113	2.655			23.5813	0.136	0.16	0.112	2.655
24.5308	0.138	0.164	0.112	2.653			23.5993	0.135	0.159	0.112	2.653
24.5485	0.137	0.164	0.112	2.651			23.6173	0.136	0.16	0.111	2.651
24.5663	0.137	0.162	0.113	2.649			23.6354	0.135	0.159	0.111	2.649
24.5841	0.137	0.162	0.112	2.647			23.6534	0.135	0.159	0.111	2.647
24.6019	0.137	0.162	0.112	2.645			23.6714	0.135	0.159	0.111	2.645
24.6196	0.136	0.162	0.111	2.643			23.6895	0.135	0.16	0.111	2.643
24.6374	0.136	0.162	0.111	2.642			23.7075	0.135	0.159	0.111	2.642
24.6551	0.136	0.162	0.111	2.64			23.7255	0.135	0.16	0.11	2.64
24.6729	0.136	0.161	0.11	2.638			23.7435	0.135	0.159	0.111	2.638
24.6906	0.136	0.162	0.111	2.636			23.7615	0.134	0.158	0.11	2.636
24.7083	0.136	0.161	0.111	2.634			23.7795	0.134	0.158	0.11	2.634
24.7261	0.135	0.161	0.11	2.632			23.7975	0.134	0.158	0.11	2.632
24.7438	0.135	0.16	0.11	2.63			23.8155	0.134	0.159	0.11	2.63
24.7615	0.135	0.161	0.11	2.628			23.8334	0.134	0.158	0.11	2.628
24.7792	0.135	0.16	0.111	2.627			23.8514	0.134	0.158	0.11	2.627
24.7969	0.134	0.16	0.109	2.625			23.8694	0.134	0.158	0.111	2.625
24.8146	0.134	0.159	0.11	2.623			23.8874	0.134	0.158	0.11	2.623
24.8323	0.135	0.16	0.109	2.621			23.9053	0.134	0.159	0.109	2.621
24.85	0.134	0.16	0.109	2.619			23.9233	0.134	0.158	0.11	2.619
24.8677	0.134	0.159	0.109	2.617			23.9412	0.133	0.157	0.109	2.617
24.8854	0.134	0.16	0.109	2.616			23.9592	0.133	0.157	0.108	2.616
24.9031	0.133	0.159	0.109	2.614			23.9771	0.133	0.158	0.11	2.614
24.9208	0.133	0.159	0.109	2.612			23.995	0.133	0.157	0.109	2.612
24.9384	0.133	0.159	0.109	2.61			24.013	0.133	0.157	0.109	2.61
24.9561	0.133	0.159	0.108	2.608			24.0309	0.133	0.157	0.108	2.608
24.9737	0.133	0.159	0.108	2.606			24.0488	0.133	0.157	0.109	2.606
24.9914	0.133	0.158	0.108	2.605			24.0667	0.132	0.156	0.108	2.605
25.009	0.413	1.061	0.108	2.603			24.0846	0.413	1.059	0.109	2.603
25.0267	0.133	0.158	0.108	2.601			24.1026	0.132	0.156	0.108	2.601
25.0443	0.132	0.158	0.108	2.599			24.1205	0.132	0.157	0.108	2.599
25.062	0.132	0.157	0.107	2.597			24.1383	0.132	0.156	0.108	2.597
25.0796	0.131	0.157	0.107	2.596			24.1562	0.131	0.155	0.108	2.596
25.0972	0.132	0.157	0.107	2.594			24.1741	0.132	0.156	0.108	2.594
25.1148	0.131	0.157	0.107	2.592			24.192	0.131	0.155	0.108	2.592
25.1324	0.131	0.156	0.107	2.59			24.2099	0.131	0.156	0.108	2.59
25.1501	0.131	0.158	0.107	2.589			24.2278	0.131	0.156	0.108	2.589
25.1677	0.131	0.157	0.106	2.587			24.2456	0.131	0.155	0.107	2.587
25.1853	0.131	0.157	0.107	2.585			24.2635	0.131	0.154	0.108	2.585
25.2029	0.131	0.155	0.107	2.583			24.2813	0.131	0.155	0.107	2.583
25.2204	0.13	0.156	0.106	2.581			24.2992	0.131	0.154	0.107	2.581
25.238	0.131	0.156	0.106	2.58			24.317	0.131	0.154	0.107	2.58
25.2556	0.13	0.155	0.106	2.578			24.3349	0.13	0.154	0.107	2.578
25.2732	0.13	0.155	0.106	2.576			24.3527	0.131	0.154	0.107	2.576
25.2907	0.13	0.155	0.106	2.574			24.3705	0.13	0.154	0.107	2.574
25.3083	0.13	0.156	0.106	2.573			24.3883	0.13	0.154	0.106	2.573
25.3258	0.129	0.155	0.105	2.571			24.4062	0.13	0.153	0.107	2.571
25.3434	0.129	0.154	0.105	2.569			24.424	0.13	0.154	0.106	2.569
25.3609	0.13	0.155	0.105	2.567			24.4418	0.13	0.153	0.106	2.567
25.3785	0.13	0.155	0.105	2.566			24.4596	0.13	0.153	0.106	2.566
25.396	0.13	0.154	0.106	2.564			24.4774	0.129	0.152	0.106	2.564
25.4136	0.13	0.155	0.105	2.562			24.4952	0.129	0.153	0.106	2.562
25.4311	0.129	0.154	0.104	2.56			24.513	0.129	0.152	0.106	2.56
25.4486	0.129	0.153	0.104	2.559			24.5308	0.129	0.153	0.105	2.559
25.4661	0.129	0.153	0.105	2.557			24.5485	0.129	0.152	0.105	2.557
25.4836	0.129	0.153	0.105	2.555			24.5663	0.128	0.152	0.105	2.555
25.5011	0.129	0.153	0.104	2.553			24.5841	0.128	0.152	0.105	2.553
25.5186	0.128	0.153	0.104	2.552			24.6019	0.128	0.152	0.106	2.552
25.5361	0.128	0.153	0.104	2.55			24.6196	0.128	0.151	0.105	2.55
25.5536	0.128	0.152	0.104	2.548			24.6374	0.128	0.152	0.105	2.548
25.5711	0.128	0.152	0.104	2.547			24.6551	0.127	0.15	0.104	2.547
25.5886	0.128	0.153	0.104	2.545			24.6729	0.128	0.151	0.104	2.545
25.6061	0.128	0.152	0.105	2.543			24.6906	0.128	0.151	0.105	2.543
25.6235	0.128	0.152	0.104	2.541			24.7083	0.127	0.149	0.104	2.541
25.641	0.127	0.151	0.105	2.54			24.7261	0.127	0.15	0.104	2.54
25.6585	0.128	0.152	0.104	2.538			24.7438	0.127	0.15	0.104	2.538
25.6759	0.128	0.151	0.105	2.536			24.7615	0.127	0.15	0.104	2.536
25.6934	0.128	0.151	0.106	2.535			24.7792	0.127	0.15	0.103	2.535
25.7108	0.127	0.15	0.105	2.533			24.7969	0.127	0.149	0.104	2.533
25.7282	0.127	0.151	0.105	2.531			24.8146	0.126	0.149	0.104	2.531
25.7457	0.127	0.151	0.104	2.53			24.8323	0.127	0.149	0.104	2.53
25.7631	0.127	0.151	0.104	2.528			24.85	0.127	0.149	0.103	2.528
25.7805	0.126	0.15	0.104	2.526			24.8677	0.126	0.148	0.102	2.526
25.798	0.127	0.15	0.103	2.525			24.8854	0.126	0.148	0.103	2.525
25.8154	0.127	0.149	0.103	2.523			24.9031	0.126	0.149	0.102	2.523
25.8328	0.126	0.15	0.103	2.521			24.9208	0.126	0.148	0.103	2.521
25.8502	0.126	0.149	0.103	2.52			24.9384	0.126	0.148	0.103	2.52
25.8676	0.126	0.15	0.102	2.518			24.9561	0.126	0.148	0.103	2.518
25.885	0.126	0.149	0.103	2.516			24.9737	0.125	0.147	0.103	2.516
25.9024	0.126	0.149	0.102	2.515			24.9914	0.126	0.148	0.102	2.515
25.9198	0.126	0.149	0.102	2.513			25.009	0.125	0.147	0.102	2.513
25.9371	0.125	0.148	0.102	2.511			25.0267	0.125	0.147	0.102	2.511
25.9545	0.125	0.149	0.102	2.51			25.0443	0.125	0.147	0.101	2.51
25.9719	0.125	0.148	0.101	2.508			25.062	0.125	0.146	0.101	2.508
25.9892	0.125	0.149	0.101	2.506			25.0796	0.125	0.147	0.102	2.506
26.0066	0.125	0.148	0.101	2.505			25.0972	0.125	0.147	0.102	2.505
26.0239	0.125	0.148	0.101	2.503			25.1148	0.124	0.146	0.101	2.503
26.0413	0.124	0.148	0.1	2.501			25.1324	0.125	0.146	0.102	2.501
26.0586	0.124	0.148	0.101	2.5			25.1501	0.124	0.145	0.101	2.5
26.076	0.124	0.147	0.1	2.498			25.1677	0.124	0.146	0.101	2.498
26.0933	0.124	0.147	0.101	2.496			25.1853	0.124	0.145	0.101	2.496
26.1106	0.124	0.147	0.1	2.495			25.2029	0.124	0.145	0.101	2.495
26.1279	0.124	0.147	0.1	2.493			25.2204	0.124	0.145	0.101	2.493
26.1453	0.124	0.147	0.1	2.492			25.238	0.123	0.145	0.1	2.492
26.1626	0.124	0.147	0.101	2.49			25.2556	0.123	0.144	0.101	2.49
26.1799	0.123	0.146	0.1	2.488			25.2732	0.123	0.144	0.101	2.488
26.1972	0.123	0.146	0.1	2.487			25.2907	0.123	0.145	0.1	2.487
26.2145	0.123	0.146	0.101	2.485			25.3083	0.123	0.144	0.1	2.485
26.2318	0.123	0.146	0.101	2.484			25.3258	0.123	0.144	0.1	2.484
26.2491	0.123	0.146	0.1	2.482			25.3434	0.123	0.144	0.1	2.482
26.2663	0.123	0.145	0.1	2.48			25.3609	0.123	0.144	0.101	2.48
26.2836	0.123	0.146	0.099	2.479			25.3785	0.123	0.144	0.101	2.479
26.3009	0.123	0.146	0.1	2.477			25.396	0.123	0.144	0.1	2.477
26.3181	0.122	0.145	0.099	2.476			25.4136	0.122	0.143	0.1	2.476
26.3354	0.122	0.145	0.1	2.474			25.4311	0.122	0.144	0.1	2.474
26.3527	0.122	0.145	0.099	2.472			25.4486	0.122	0.143	0.1	2.472
26.3699	0.122	0.145	0.1	2.471			25.4661	0.122	0.143	0.1	2.471
26.3872	0.122	0.144	0.099	2.469			25.4836	0.122	0.142	0.1	2.469
26.4044	0.122	0.144	0.099	2.468			25.5011	0.122	0.143	0.1	2.468
26.4216	0.122	0.144	0.099	2.466			25.5186	0.121	0.143	0.099	2.466
26.4389	0.122	0.144	0.098	2.464			25.5361	0.121	0.142	0.099	2.464
26.4561	0.121	0.144	0.099	2.463			25.5536	0.121	0.141	0.098	2.463
26.4733	0.121	0.143	0.098	2.461			25.5711	0.121	0.142	0.1	2.461
26.4905	0.121	0.143	0.098	2.46			25.5886	0.121	0.142	0.099	2.46
26.5077	0.121	0.143	0.098	2.458			25.6061	0.121	0.142	0.099	2.458
26.5249	0.121	0.143	0.098	2.457			25.6235	0.121	0.142	0.099	2.457
26.5421	0.121	0.143	0.098	2.455			25.641	0.121	0.141	0.099	2.455
26.5593	0.121	0.143	0.098	2.453			25.6585	0.12	0.141	0.098	2.453
26.5765	0.121	0.143	0.099	2.452			25.6759	0.12	0.141	0.098	2.452
26.5937	0.12	0.142	0.098	2.45			25.6934	0.12	0.14	0.098	2.45
26.6109	0.121	0.143	0.098	2.449			25.7108	0.12	0.141	0.099	2.449
26.628	0.12	0.142	0.098	2.447			25.7282	0.12	0.141	0.099	2.447
26.6452	0.12	0.142	0.098	2.446			25.7457	0.12	0.14	0.098	2.446
26.6624	0.12	0.141	0.097	2.444			25.7631	0.12	0.14	0.098	2.444
26.6795	0.119	0.141	0.097	2.443			25.7805	0.12	0.14	0.098	2.443
26.6967	0.12	0.142	0.098	2.441			25.798	0.12	0.139	0.098	2.441
26.7138	0.12	0.142	0.098	2.44			25.8154	0.12	0.14	0.098	2.44
26.731	0.12	0.141	0.098	2.438			25.8328	0.119	0.14	0.098	2.438
26.7481	0.12	0.142	0.097	2.436			25.8502	0.119	0.14	0.098	2.436
26.7652	0.12	0.141	0.098	2.435			25.8676	0.119	0.14	0.098	2.435
26.7824	0.12	0.141	0.098	2.433			25.885	0.119	0.139	0.097	2.433
26.7995	0.119	0.14	0.098	2.432			25.9024	0.119	0.139	0.098	2.432
26.8166	0.119	0.14	0.098	2.43			25.9198	0.119	0.138	0.098	2.43
26.8337	0.119	0.141	0.098	2.429			25.9371	0.119	0.139	0.098	2.429
26.8508	0.119	0.14	0.098	2.427			25.9545	0.119	0.139	0.097	2.427
26.8679	0.119	0.14	0.099	2.426			25.9719	0.119	0.139	0.098	2.426
26.885	0.119	0.14	0.099	2.424			25.9892	0.119	0.139	0.097	2.424
26.9021	0.119	0.14	0.099	2.423			26.0066	0.119	0.138	0.098	2.423
26.9192	0.119	0.14	0.099	2.421			26.0239	0.119	0.138	0.098	2.421
26.9363	0.119	0.139	0.099	2.42			26.0413	0.119	0.138	0.098	2.42
26.9533	0.119	0.14	0.099	2.418			26.0586	0.118	0.138	0.098	2.418
26.9704	0.119	0.139	0.099	2.417			26.076	0.119	0.138	0.098	2.417
26.9875	0.119	0.139	0.099	2.415			26.0933	0.119	0.139	0.098	2.415
27.0045	0.119	0.139	0.1	2.414			26.1106	0.119	0.138	0.098	2.414
27.0216	0.119	0.139	0.099	2.412			26.1279	0.119	0.138	0.099	2.412
27.0386	0.12	0.139	0.101	2.411			26.1453	0.119	0.138	0.099	2.411
27.0557	0.12	0.14	0.101	2.409			26.1626	0.119	0.138	0.099	2.409
27.0727	0.12	0.139	0.102	2.408			26.1799	0.12	0.138	0.1	2.408
27.0897	0.12	0.139	0.102	2.406			26.1972	0.12	0.138	0.101	2.406
27.1068	0.12	0.138	0.103	2.405			26.2145	0.12	0.138	0.101	2.405
27.1238	0.12	0.138	0.102	2.403			26.2318	0.121	0.138	0.102	2.403
27.1408	0.12	0.139	0.103	2.402			26.2491	0.121	0.139	0.103	2.402
27.1578	0.121	0.139	0.105	2.4			26.2663	0.122	0.139	0.104	2.4
27.1748	0.121	0.139	0.105	2.399			26.2836	0.122	0.139	0.105	2.399
27.1918	0.122	0.139	0.107	2.397			26.3009	0.123	0.138	0.106	2.397
27.2088	0.122	0.138	0.108	2.396			26.3181	0.123	0.139	0.107	2.396
27.2258	0.122	0.138	0.108	2.394			26.3354	0.124	0.14	0.107	2.394
27.2428	0.123	0.139	0.11	2.393			26.3527	0.124	0.139	0.109	2.393
27.2598	0.123	0.139	0.111	2.392			26.3699	0.124	0.139	0.11	2.392
27.2768	0.123	0.138	0.112	2.39			26.3872	0.125	0.139	0.11	2.39
27.2937	0.124	0.138	0.113	2.389			26.4044	0.125	0.139	0.11	2.389
27.3107	0.124	0.138	0.113	2.387			26.4216	0.125	0.139	0.111	2.387
27.3277	0.125	0.138	0.115	2.386			26.4389	0.125	0.139	0.111	2.386
27.3446	0.125	0.138	0.115	2.384			26.4561	0.126	0.139	0.111	2.384
27.3616	0.125	0.138	0.117	2.383			26.4733	0.125	0.139	0.111	2.383
27.3785	0.126	0.138	0.117	2.381			26.4905	0.125	0.138	0.112	2.381
27.3955	0.126	0.138	0.118	2.38			26.5077	0.125	0.139	0.111	2.38
27.4124	0.126	0.138	0.117	2.378			26.5249	0.125	0.138	0.111	2.378
27.4293	0.126	0.138	0.118	2.377			26.5421	0.125	0.139	0.111	2.377
27.4462	0.125	0.137	0.117	2.376			26.5593	0.125	0.139	0.11	2.376
27.4631	0.125	0.137	0.116	2.374			26.5765	0.124	0.138	0.109	2.374
27.4801	0.125	0.138	0.116	2.373			26.5937	0.124	0.139	0.109	2.373
27.497	0.125	0.137	0.116	2.371			26.6109	0.124	0.139	0.108	2.371
27.5139	0.124	0.137	0.115	2.37			26.628	0.123	0.138	0.107	2.37
27.5308	0.124	0.137	0.114	2.368			26.6452	0.123	0.138	0.107	2.368
27.5477	0.124	0.137	0.113	2.367			26.6624	0.123	0.138	0.106	2.367
27.5646	0.123	0.137	0.112	2.366			26.6795	0.122	0.137	0.105	2.366
27.5814	0.123	0.137	0.112	2.364			26.6967	0.122	0.138	0.105	2.364
27.5983	0.123	0.136	0.11	2.363			26.7138	0.121	0.137	0.104	2.363
27.6152	0.121	0.135	0.109	2.361			26.731	0.121	0.137	0.104	2.361
27.6321	0.122	0.136	0.109	2.36			26.7481	0.121	0.137	0.104	2.36
27.6489	0.121	0.135	0.108	2.359			26.7652	0.121	0.136	0.104	2.359
27.6658	0.121	0.135	0.108	2.357			26.7824	0.12	0.136	0.103	2.357
27.6826	0.121	0.135	0.107	2.356			26.7995	0.12	0.136	0.103	2.356
27.6995	0.12	0.135	0.107	2.354			26.8166	0.12	0.136	0.102	2.354
27.7163	0.12	0.134	0.106	2.353			26.8337	0.119	0.136	0.102	2.353
27.7331	0.119	0.135	0.106	2.352			26.8508	0.119	0.135	0.101	2.352
27.75	0.12	0.135	0.105	2.35			26.8679	0.119	0.136	0.101	2.35
27.7668	0.118	0.133	0.104	2.349			26.885	0.118	0.134	0.1	2.349
27.7836	0.118	0.134	0.104	2.347			26.9021	0.118	0.134	0.099	2.347
27.8004	0.118	0.134	0.103	2.346			26.9192	0.117	0.133	0.1	2.346
27.8173	0.118	0.134	0.102	2.345			26.9363	0.117	0.134	0.099	2.345
27.8341	0.118	0.133	0.102	2.343			26.9533	0.117	0.133	0.099	2.343
27.8509	0.117	0.133	0.103	2.342			26.9704	0.117	0.133	0.099	2.342
27.8677	0.117	0.132	0.102	2.34			26.9875	0.116	0.133	0.098	2.34
27.8844	0.117	0.133	0.102	2.339			27.0045	0.116	0.133	0.098	2.339
27.9012	0.116	0.132	0.101	2.338			27.0216	0.116	0.132	0.098	2.338
27.918	0.116	0.132	0.101	2.336			27.0386	0.116	0.133	0.097	2.336
27.9348	0.116	0.132	0.101	2.335			27.0557	0.115	0.131	0.097	2.335
27.9515	0.115	0.132	0.099	2.333			27.0727	0.115	0.132	0.097	2.333
27.9683	0.116	0.132	0.099	2.332			27.0897	0.116	0.133	0.097	2.332
27.9851	0.115	0.131	0.099	2.331			27.1068	0.115	0.131	0.096	2.331
28.0018	0.115	0.131	0.099	2.329			27.1238	0.115	0.132	0.096	2.329
28.0186	0.115	0.131	0.098	2.328			27.1408	0.114	0.131	0.096	2.328
28.0353	0.115	0.131	0.098	2.327			27.1578	0.114	0.131	0.096	2.327
28.052	0.114	0.13	0.098	2.325			27.1748	0.114	0.13	0.095	2.325
28.0688	0.114	0.13	0.098	2.324			27.1918	0.114	0.13	0.095	2.324
28.0855	0.114	0.13	0.098	2.323			27.2088	0.113	0.13	0.095	2.323
28.1022	0.114	0.13	0.098	2.321			27.2258	0.113	0.13	0.094	2.321
28.1189	0.114	0.13	0.097	2.32			27.2428	0.113	0.13	0.094	2.32
28.1356	0.113	0.129	0.097	2.319			27.2598	0.113	0.129	0.095	2.319
28.1523	0.113	0.129	0.098	2.317			27.2768	0.113	0.129	0.094	2.317
28.169	0.113	0.13	0.097	2.316			27.2937	0.113	0.13	0.094	2.316
28.1857	0.113	0.129	0.097	2.314			27.3107	0.112	0.128	0.094	2.314
28.2024	0.113	0.128	0.097	2.313			27.3277	0.112	0.129	0.094	2.313
28.2191	0.113	0.128	0.097	2.312			27.3446	0.112	0.129	0.094	2.312
28.2358	0.113	0.128	0.096	2.31			27.3616	0.112	0.128	0.094	2.31
28.2525	0.112	0.128	0.096	2.309			27.3785	0.112	0.128	0.093	2.309
28.2691	0.112	0.127	0.096	2.308			27.3955	0.111	0.128	0.093	2.308
28.2858	0.112	0.127	0.096	2.306			27.4124	0.111	0.127	0.093	2.306
28.3025	0.112	0.128	0.097	2.305			27.4293	0.111	0.127	0.093	2.305
28.3191	0.112	0.128	0.096	2.304			27.4462	0.111	0.127	0.094	2.304
28.3358	0.112	0.127	0.096	2.302			27.4631	0.111	0.128	0.093	2.302
28.3524	0.112	0.127	0.096	2.301			27.4801	0.111	0.127	0.093	2.301
28.3691	0.112	0.127	0.095	2.3			27.497	0.111	0.126	0.093	2.3
28.3857	0.112	0.127	0.096	2.299			27.5139	0.111	0.127	0.093	2.299
28.4023	0.112	0.127	0.096	2.297			27.5308	0.111	0.127	0.093	2.297
28.4189	0.112	0.127	0.096	2.296			27.5477	0.111	0.127	0.093	2.296
28.4355	0.111	0.127	0.096	2.295			27.5646	0.111	0.127	0.093	2.295
28.4522	0.112	0.127	0.096	2.293			27.5814	0.111	0.126	0.093	2.293
28.4688	0.111	0.126	0.096	2.292			27.5983	0.11	0.126	0.093	2.292
28.4854	0.111	0.126	0.096	2.291			27.6152	0.11	0.126	0.092	2.291
28.502	0.111	0.125	0.096	2.289			27.6321	0.11	0.126	0.092	2.289
28.5186	0.111	0.126	0.096	2.288			27.6489	0.11	0.126	0.093	2.288
28.5351	0.111	0.126	0.096	2.287			27.6658	0.11	0.126	0.093	2.287
28.5517	0.111	0.125	0.096	2.285			27.6826	0.11	0.126	0.093	2.285
28.5683	0.11	0.125	0.096	2.284			27.6995	0.11	0.125	0.093	2.284
28.5849	0.124	0.164	0.096	2.283			27.7163	0.126	0.17	0.093	2.283
28.6014	0.11	0.124	0.096	2.282			27.7331	0.11	0.126	0.092	2.282
28.618	0.11	0.125	0.096	2.28			27.75	0.11	0.125	0.092	2.28
28.6345	0.11	0.125	0.095	2.279			27.7668	0.11	0.125	0.093	2.279
28.6511	0.11	0.124	0.095	2.278			27.7836	0.11	0.125	0.093	2.278
28.6676	0.11	0.124	0.095	2.276			27.8004	0.109	0.124	0.092	2.276
28.6842	0.11	0.124	0.096	2.275			27.8173	0.109	0.124	0.093	2.275
28.7007	0.11	0.124	0.095	2.274			27.8341	0.11	0.124	0.093	2.274
28.7172	0.11	0.124	0.096	2.273			27.8509	0.109	0.125	0.092	2.273
28.7338	0.11	0.123	0.095	2.271			27.8677	0.11	0.125	0.093	2.271
28.7503	0.11	0.124	0.096	2.27			27.8844	0.11	0.124	0.093	2.27
28.7668	0.11	0.123	0.095	2.269			27.9012	0.109	0.124	0.092	2.269
28.7833	0.109	0.123	0.096	2.267			27.918	0.109	0.124	0.092	2.267
28.7998	0.109	0.123	0.096	2.266			27.9348	0.109	0.124	0.093	2.266
28.8163	0.109	0.123	0.095	2.265			27.9515	0.109	0.124	0.092	2.265
28.8328	0.109	0.123	0.095	2.264			27.9683	0.109	0.124	0.092	2.264
28.8493	0.11	0.123	0.096	2.262			27.9851	0.109	0.124	0.093	2.262
28.8657	0.109	0.122	0.095	2.261			28.0018	0.109	0.123	0.092	2.261
28.8822	0.109	0.123	0.095	2.26			28.0186	0.109	0.124	0.093	2.26
28.8987	0.109	0.123	0.095	2.259			28.0353	0.109	0.123	0.093	2.259
28.9152	0.109	0.123	0.095	2.257			28.052	0.109	0.123	0.093	2.257
28.9316	0.109	0.122	0.096	2.256			28.0688	0.109	0.123	0.092	2.256
28.9481	0.11	0.123	0.096	2.255			28.0855	0.108	0.123	0.092	2.255
28.9645	0.109	0.122	0.095	2.254			28.1022	0.109	0.123	0.092	2.254
28.981	0.109	0.122	0.096	2.252			28.1189	0.108	0.122	0.092	2.252
28.9974	0.109	0.122	0.095	2.251			28.1356	0.109	0.123	0.092	2.251
29.0139	0.109	0.122	0.096	2.25			28.1523	0.109	0.123	0.092	2.25
29.0303	0.109	0.121	0.095	2.249			28.169	0.109	0.123	0.092	2.249
29.0467	0.109	0.122	0.095	2.247			28.1857	0.108	0.123	0.092	2.247
29.0631	0.109	0.122	0.095	2.246			28.2024	0.108	0.122	0.092	2.246
29.0795	0.109	0.122	0.095	2.245			28.2191	0.108	0.123	0.092	2.245
29.0959	0.108	0.121	0.095	2.244			28.2358	0.108	0.123	0.092	2.244
29.1123	0.108	0.121	0.095	2.242			28.2525	0.108	0.122	0.091	2.242
29.1287	0.108	0.121	0.095	2.241			28.2691	0.108	0.122	0.092	2.241
29.1451	0.108	0.121	0.095	2.24			28.2858	0.108	0.122	0.091	2.24
29.1615	0.108	0.121	0.095	2.239			28.3025	0.108	0.122	0.092	2.239
29.1779	0.108	0.12	0.095	2.237			28.3191	0.107	0.122	0.091	2.237
29.1943	0.108	0.12	0.095	2.236			28.3358	0.107	0.122	0.091	2.236
29.2107	0.108	0.121	0.095	2.235			28.3524	0.108	0.122	0.092	2.235
29.227	0.108	0.121	0.095	2.234			28.3691	0.108	0.122	0.091	2.234
29.2434	0.108	0.121	0.094	2.233			28.3857	0.108	0.122	0.091	2.233
29.2597	0.107	0.12	0.094	2.231			28.4023	0.107	0.121	0.091	2.231
29.2761	0.107	0.12	0.094	2.23			28.4189	0.107	0.121	0.091	2.23
29.2924	0.107	0.119	0.094	2.229			28.4355	0.107	0.121	0.09	2.229
29.3088	0.107	0.12	0.093	2.228			28.4522	0.107	0.122	0.091	2.228
29.3251	0.107	0.12	0.094	2.226			28.4688	0.107	0.121	0.09	2.226
29.3414	0.107	0.119	0.094	2.225			28.4854	0.107	0.121	0.091	2.225
29.3578	0.107	0.119	0.093	2.224			28.502	0.106	0.121	0.089	2.224
29.3741	0.106	0.119	0.093	2.223			28.5186	0.106	0.121	0.09	2.223
29.3904	0.106	0.119	0.093	2.222			28.5351	0.106	0.121	0.089	2.222
29.4067	0.106	0.119	0.093	2.22			28.5517	0.106	0.121	0.09	2.22
29.423	0.106	0.119	0.092	2.219			28.5683	0.106	0.12	0.088	2.219
29.4393	0.106	0.119	0.092	2.218			28.5849	0.106	0.12	0.089	2.218
29.4556	0.105	0.118	0.091	2.217			28.6014	0.105	0.12	0.088	2.217
29.4719	0.105	0.119	0.091	2.216			28.618	0.105	0.12	0.088	2.216
29.4882	0.105	0.118	0.091	2.214			28.6345	0.105	0.12	0.088	2.214
29.5044	0.105	0.118	0.091	2.213			28.6511	0.105	0.12	0.088	2.213
29.5207	0.105	0.118	0.09	2.212			28.6676	0.105	0.119	0.088	2.212
29.537	0.105	0.118	0.09	2.211			28.6842	0.105	0.119	0.087	2.211
29.5532	0.104	0.117	0.09	2.21			28.7007	0.104	0.119	0.088	2.21
29.5695	0.104	0.118	0.09	2.208			28.7172	0.104	0.119	0.087	2.208
29.5858	0.104	0.117	0.089	2.207			28.7338	0.104	0.119	0.087	2.207
29.602	0.104	0.117	0.09	2.206			28.7503	0.104	0.119	0.086	2.206
29.6182	0.103	0.116	0.089	2.205			28.7668	0.104	0.119	0.086	2.205
29.6345	0.103	0.117	0.089	2.204			28.7833	0.104	0.118	0.086	2.204
29.6507	0.103	0.117	0.089	2.203			28.7998	0.103	0.118	0.086	2.203
29.6669	0.103	0.117	0.088	2.201			28.8163	0.104	0.118	0.087	2.201
29.6831	0.103	0.117	0.088	2.2			28.8328	0.103	0.117	0.086	2.2
29.6994	0.103	0.116	0.088	2.199			28.8493	0.103	0.118	0.086	2.199
29.7156	0.103	0.116	0.088	2.198			28.8657	0.103	0.117	0.086	2.198
29.7318	0.102	0.116	0.087	2.197			28.8822	0.103	0.118	0.086	2.197
29.748	0.102	0.116	0.087	2.195			28.8987	0.103	0.118	0.086	2.195
29.7642	0.102	0.115	0.087	2.194			28.9152	0.102	0.117	0.086	2.194
29.7803	0.101	0.115	0.086	2.193			28.9316	0.102	0.117	0.085	2.193
29.7965	0.102	0.115	0.086	2.192			28.9481	0.102	0.117	0.085	2.192
29.8127	0.101	0.115	0.086	2.191			28.9645	0.102	0.116	0.085	2.191
29.8289	0.101	0.115	0.086	2.19			28.981	0.102	0.117	0.085	2.19
29.8451	0.101	0.115	0.086	2.188			28.9974	0.102	0.116	0.085	2.188
29.8612	0.101	0.115	0.086	2.187			29.0139	0.102	0.117	0.085	2.187
29.8774	0.1	0.115	0.085	2.186			29.0303	0.101	0.116	0.084	2.186
29.8935	0.101	0.115	0.085	2.185			29.0467	0.101	0.116	0.084	2.185
29.9097	0.1	0.114	0.085	2.184			29.0631	0.101	0.116	0.084	2.184
29.9258	0.1	0.114	0.085	2.183			29.0795	0.101	0.115	0.084	2.183
29.9419	0.1	0.114	0.085	2.182			29.0959	0.101	0.116	0.084	2.182
29.9581	0.1	0.114	0.085	2.18			29.1123	0.1	0.115	0.084	2.18
29.9742	0.1	0.114	0.084	2.179			29.1287	0.101	0.116	0.084	2.179
29.9903	0.1	0.114	0.084	2.178			29.1451	0.1	0.115	0.083	2.178
30.0064	0.099	0.113	0.084	2.177			29.1615	0.1	0.115	0.083	2.177
30.0225	0.099	0.113	0.084	2.176			29.1779	0.1	0.115	0.083	2.176
30.0386	0.099	0.113	0.083	2.175			29.1943	0.1	0.115	0.083	2.175
30.0547	0.099	0.113	0.084	2.174			29.2107	0.1	0.114	0.083	2.174
30.0708	0.099	0.113	0.083	2.172			29.227	0.1	0.115	0.083	2.172
30.0869	0.099	0.113	0.083	2.171			29.2434	0.099	0.114	0.083	2.171
30.103	0.098	0.113	0.083	2.17			29.2597	0.1	0.114	0.083	2.17
30.1191	0.098	0.112	0.083	2.169			29.2761	0.1	0.114	0.082	2.169
30.1352	0.099	0.112	0.083	2.168			29.2924	0.099	0.114	0.082	2.168
30.1512	0.098	0.112	0.083	2.167			29.3088	0.099	0.114	0.082	2.167
30.1673	0.098	0.112	0.082	2.166			29.3251	0.099	0.114	0.082	2.166
30.1834	0.098	0.112	0.082	2.165			29.3414	0.099	0.113	0.081	2.165
30.1994	0.098	0.112	0.082	2.163			29.3578	0.099	0.113	0.082	2.163
30.2155	0.098	0.112	0.083	2.162			29.3741	0.099	0.113	0.083	2.162

## Sheet: 2F Competition
Time (min)	1 mM 300 mer	1 mM 14mer							14mer						300mer
0.0276	0.325095	0.358119						0.1 mM	9.53895	-6.96231	10.8126	21.5553	8.53392	31.0092	22.7687	22.0957	23.7792	19.3361	1.42839	2.25732
0.12445	0.29929	0.331763						1 mM	26.1168	56.0909	27.2904	52.7831	54.1007	46.7246	69.9955	59.9012	72.4361	80.3333	72.677	77.7913
0.2233	0.331875	0.341445						10 mM	45.9581	62.8518	47.2262	75.5567	46.4714	60.2486	76.0487	87.6824	77.6595	70.9059	82.4823	91.5778
0.3219	0.283114	0.315889
0.4199	0.311352	0.352936
0.5189	0.344333	0.335616
0.6173	0.319479	0.328827
0.7156	0.325266	0.330325
0.81405	0.304677	0.33168
0.9125	0.287399	0.323378
1.01095	0.306824	0.310358
1.1094	0.339679	0.325238
1.20835	0.308836	0.331219
1.3068	0.336899	0.313489
1.4052	0.324164	0.34206
1.5037	0.315008	0.324197
1.6027	0.299393	0.32026
1.701	0.363801	0.337151
1.79945	0.32357	0.336778
1.8979	0.34083	0.32472
1.99635	0.340446	0.319293
2.09495	0.327816	0.341264
2.19345	0.326049	0.324417
2.2919	0.342744	0.360061
2.3901	0.324742	0.30888
2.48855	0.30659	0.331272
2.58695	0.305983	0.31565
2.68545	0.33308	0.304967
2.78385	0.298543	0.297532
2.8828	0.348626	0.319796
2.9812	0.319715	0.351411
3.0797	0.311322	0.334208
3.1786	0.308163	0.313044
3.27705	0.337533	0.311987
3.37545	0.327526	0.331635
3.47395	0.318146	0.37844
3.5729	0.301502	0.230908
3.67135	0.216851	0.276218
3.7694	0.196617	0.250938
3.8682	0.218565	0.241017
3.96675	0.199314	0.27332
4.06505	0.238932	0.257454
4.1635	0.236981	0.274802
4.26195	0.237104	0.265499
4.3604	0.196805	0.264241
4.45935	0.190469	0.284181
4.5578	0.195004	0.282766
4.65675	0.195064	0.255852
4.7552	0.195054	0.280114
4.8536	0.217713	0.275568
4.95095	0.191499	0.258921
5.0474	0.149928	0.249683
5.14575	0.1868	0.283897
5.2432	0.211194	0.275541
5.3395	0.205358	0.270615
5.43795	0.184887	0.281656
5.5364	0.199839	0.259899
5.6349	0.189222	0.313252
5.73335	0.20334	0.269946
5.8317	0.199844	0.295897
5.93015	0.175016	0.269364
6.0286	0.190925	0.231546
6.127	0.168009	0.26221
6.22545	0.171283	0.246262
6.32285	0.184153	0.256151
6.42135	0.197229	0.26118
6.51985	0.218105	0.293476
6.6182	0.213532	0.266199
6.7167	0.168536	0.261395
6.8156	0.19902	0.259247
6.9145	0.218843	0.279431
7.01295	0.157284	0.265464
7.1114	0.186444	0.245822
7.20985	0.185869	0.255919
7.3083	0.206779	0.284446
7.4056	0.209669	0.291447
7.5021	0.200895	0.298598
7.60055	0.181024	0.289422
7.70145	0.155436	0.302548
7.7998	0.20262	0.277226
7.89795	0.178413	0.271649
7.99685	0.184643	0.245716
8.0955	0.201486	0.292214
8.1935	0.166356	0.268304
8.2916	0.210269	0.287863
8.39055	0.177595	0.252335
8.49065	0.191881	0.292129
8.5894	0.188148	0.266494
8.68785	0.183683	0.301311
8.78655	0.18267	0.257578
8.88545	0.208414	0.311415

## Sheet: 2G Molybdate
c (PolyP Pi) [uM]	polyP alone	polyP fibrils	polyP monomers
256	249.647	171.53	244.458
126	119.975	62.4119	114.718
69	62.6167	26.6992	55.9931
0	0	0	0

## Sheet: 2H Molybdate spin down
		bound protected			bound			free
	monomers	32.3333	44.7334	30.5333				371	458.6	618
	fibers	86	75	87.5333	153.7	140.567	139.333	147.467	265.4	406.4
